# Supplementary material
Source: ML conference proceedings conference paper supplement (https://openreview.net/forum?id=vqGWslLeEw)
Supplement: supplementary_material [file attachment]

## A Experimental Details

In order to generate the results presented in Table 2 Table 3 and Table 4, we conducted a hyperparameter search and selected the best results from the final evaluations for each dataset. Our algorithm was implemented using JAX for the D4RL benchmark. For V-D4RL, we implement our approach using PyTorch adopting the TD3+BC implementation from Clean Offline RL (Tarasov et al., 2022). The experiments were conducted on V100 and A100 GPUs.

**Gym-MuJoCo and Adroit tasks.** Our study utilized the latest version of the datasets – v2 for Gym-MuJoCo and v1 for Adroit. The agents were trained for one million steps and evaluated over ten episodes.

For ReBRAC, we fine-tuned the  $\beta_1$  parameter for the actor, which was selected from 0.001, 0.01, 0.05, 0.1. Similarly, the  $\beta_2$  parameter for the critic was selected from a range of 0, 0.001, 0.01, 0.1, 0.5. The selected best parameters for each dataset are reported in Table 9.

For TD3+BC here and in the AntMaze domain, we use the same grid used in ReBRAC for actor regularization parameter  $\alpha$  and add the default value of 0.4.

For IQL here and in the AntMaze domain, we selected  $\beta$  value from a range of 0.5, 1, 3, 6, 10 and IQL  $\tau$  value from a range of 0.5, 0.7, 0.9, 0.95. We used the implementation from Clean Offline RL (Tarasov et al., 2022) and kept other parameters unchanged.

For SAC-RND in Adroit domain we tune  $\beta_1$  (actor parameter) in the range of 0.5, 1.0, 2.5, 5.0, 10.0 and  $\beta_2$  (critic parameter) in the range of 0.01, 0.1, 1.0, 5.0, 10.0.

**AntMaze tasks.** In our work, we utilized v2 of the datasets. It’s worth noting that previous studies have reported results using v0 datasets, which were found to contain numerous issues<sup>1</sup>. Each agent was trained for 1 million steps and evaluated over 100 episodes. Following Chen et al. (2022a), we modified the reward function by multiplying it by 100.

For ReBRAC, the  $\beta_1$  (actor) and  $\beta_2$  (critic) hyperparameters were carefully selected from the respective ranges of 0.0005, 0.001, 0.002, 0.003 and 0, 0.0001, 0.0005, 0.001. In addition, the actor and critic learning rates were optimized from 0.0001, 0.0002, 0.0003, 0.0005 and 0.0003, 0.0005, 0.001, respectively. The optimal hyperparameters for each dataset are presented in Table 9.

We also modified the  $\gamma$  value for ReBRAC when addressing these tasks, driven by the following motivation. The length of the episodes in AntMaze can be as long as 1000 steps, while the reward is sparse and can only be obtained at the end of the episode. As a result, the discount for the reward with the default  $\gamma$  can be as low as  $0.99^{1000} = 4 \cdot 10^{-5}$ , which is extremely low for signal propagation, even when multiplying the reward by 100. By increasing  $\gamma$  to 0.999, the minimum discount value becomes  $0.999^{1000} = 0.36$ , which is more favorable for signal propagation.

**V-D4RL.** We used single-task datasets without distraction with a resolution of  $84 \times 84$  pixels. For ReBRAC  $\beta_1$  (actor) parameter was selected from the range of  $\{0.03, 0.1, 0.3, 1.0\}$  and  $\beta_2$  (critic) parameter from the range of  $\{0.0, 0.001, 0.005, 0.01, 0.1\}$ .

---

<sup>1</sup><https://github.com/Farama-Foundation/D4RL/issues/77>

## 423 B Hyperparameters

### 424 B.1 ReBRAC

Table 8: ReBRAC’s general hyperparameters.

| Parameter                        | Value                                                          |
|----------------------------------|----------------------------------------------------------------|
| optimizer                        | Adam Kingma & Ba (2014)                                        |
| batch size                       | 1024 on Gym-MuJoCo, 256 on other                               |
| learning rate (all networks)     | 1e-3 on Gym-MuJoCo, 3e-4 on Adroit and V-D4RL, 1e-4 on Antmaze |
| tau ( $\tau$ )                   | 5e-3                                                           |
| hidden dim (all networks)        | 256                                                            |
| num hidden layers (all networks) | 3                                                              |
| gamma ( $\gamma$ )               | 0.999 on AntMaze, 0.99 on other                                |
| nonlinearity                     | ReLU                                                           |

Table 9: ReBRAC’s best hyperparameters used in D4RL benchmark.

| Task Name                 | $\beta_1$ (actor) | $\beta_2$ (critic) |
|---------------------------|-------------------|--------------------|
| halfcheetah-random        | 0.001             | 0.1                |
| halfcheetah-medium        | 0.001             | 0.01               |
| halfcheetah-expert        | 0.01              | 0.01               |
| halfcheetah-medium-expert | 0.01              | 0.1                |
| halfcheetah-medium-replay | 0.01              | 0.001              |
| halfcheetah-full-replay   | 0.001             | 0.1                |
| hopper-random             | 0.001             | 0.01               |
| hopper-medium             | 0.01              | 0.001              |
| hopper-expert             | 0.1               | 0.001              |
| hopper-medium-expert      | 0.1               | 0.01               |
| hopper-medium-replay      | 0.05              | 0.5                |
| hopper-full-replay        | 0.01              | 0.01               |
| walker2d-random           | 0.01              | 0.0                |
| walker2d-medium           | 0.05              | 0.1                |
| walker2d-expert           | 0.01              | 0.5                |
| walker2d-medium-expert    | 0.01              | 0.01               |
| walker2d-medium-replay    | 0.05              | 0.01               |
| walker2d-full-replay      | 0.01              | 0.01               |
| antmaze-umaze             | 0.003             | 0.002              |
| antmaze-umaze-diverse     | 0.003             | 0.001              |
| antmaze-medium-play       | 0.001             | 0.0005             |
| antmaze-medium-diverse    | 0.001             | 0.0                |
| antmaze-large-play        | 0.002             | 0.001              |
| antmaze-large-diverse     | 0.002             | 0.002              |
| pen-human                 | 0.1               | 0.5                |
| pen-cloned                | 0.05              | 0.5                |
| pen-expert                | 0.01              | 0.01               |
| door-human                | 0.1               | 0.1                |
| door-cloned               | 0.01              | 0.1                |
| door-expert               | 0.05              | 0.01               |
| hammer-human              | 0.01              | 0.5                |
| hammer-cloned             | 0.1               | 0.5                |
| hammer-expert             | 0.01              | 0.01               |
| relocate-human            | 0.1               | 0.01               |
| relocate-cloned           | 0.1               | 0.01               |
| relocate-expert           | 0.05              | 0.01               |

Table 10: ReBRAC’s best hyperparameters used in V-D4RL benchmark.

| Task Name                   | $\beta_1$ (actor) | $\beta_2$ (critic) |
|-----------------------------|-------------------|--------------------|
| walker-walk-random          | 0.03              | 0.1                |
| walker-walk-medium          | 0.03              | 0.005              |
| walker-walk-expert          | 0.1               | 0.01               |
| walker-walk-medium-expert   | 0.3               | 0.005              |
| walker-walk-medium-replay   | 0.3               | 0.01               |
| cheetah-run-random          | 0.1               | 0.01               |
| cheetah-run-medium          | 0.1               | 0.1                |
| cheetah-run-expert          | 0.01              | 0.01               |
| cheetah-run-medium-expert   | 1.0               | 0.001              |
| cheetah-run-medium-replay   | 0.03              | 0.1                |
| humanoid-walk-random        | 1.0               | 0.01               |
| humanoid-walk-medium        | 1.0               | 0.005              |
| humanoid-walk-expert        | 1.0               | 0.1                |
| humanoid-walk-medium-expert | 1.0               | 0.005              |
| humanoid-walk-medium-replay | 1.0               | 0.001              |

Table 11: IQL’s best hyperparameters used in D4RL benchmark.

| Task Name                 | $\beta$ | IQL $\tau$ |
|---------------------------|---------|------------|
| halfcheetah-random        | 3.0     | 0.95       |
| halfcheetah-medium        | 3.0     | 0.95       |
| halfcheetah-expert        | 6.0     | 0.9        |
| halfcheetah-medium-expert | 3.0     | 0.7        |
| halfcheetah-medium-replay | 3.0     | 0.95       |
| halfcheetah-full-replay   | 1.0     | 0.7        |
| hopper-random             | 1.0     | 0.95       |
| hopper-medium             | 3.0     | 0.7        |
| hopper-expert             | 3.0     | 0.5        |
| hopper-medium-expert      | 6.0     | 0.7        |
| hopper-medium-replay      | 6.0     | 0.7        |
| hopper-full-replay        | 10.0    | 0.9        |
| walker2d-random           | 0.5     | 0.9        |
| walker2d-medium           | 6.0     | 0.5        |
| walker2d-expert           | 6.0     | 0.9        |
| walker2d-medium-expert    | 1.0     | 0.5        |
| walker2d-medium-replay    | 0.5     | 0.7        |
| walker2d-full-replay      | 1.0     | 0.7        |
| antmaze-umaze             | 10.0    | 0.7        |
| antmaze-umaze-diverse     | 10.0    | 0.95       |
| antmaze-medium-play       | 6.0     | 0.9        |
| antmaze-medium-diverse    | 6.0     | 0.9        |
| antmaze-large-play        | 10.0    | 0.9        |
| antmaze-large-diverse     | 6.0     | 0.9        |
| pen-human                 | 1.0     | 0.95       |
| pen-cloned                | 10.0    | 0.9        |
| pen-expert                | 10.0    | 0.8        |
| door-human                | 0.5     | 0.9        |
| door-cloned               | 6.0     | 0.7        |
| door-expert               | 0.5     | 0.7        |
| hammer-human              | 3.0     | 0.9        |
| hammer-cloned             | 6.0     | 0.7        |
| hammer-expert             | 0.5     | 0.95       |
| relocate-human            | 1.0     | 0.95       |
| relocate-cloned           | 6.0     | 0.9        |
| relocate-expert           | 10.0    | 0.9        |

Table 12: TD3+BC’s best hyperparameters used in D4RL benchmark.

| Task Name                 | $\alpha$ |
|---------------------------|----------|
| halfcheetah-random        | 0.001    |
| halfcheetah-medium        | 0.01     |
| halfcheetah-expert        | 0.4      |
| halfcheetah-medium-expert | 0.1      |
| halfcheetah-medium-replay | 0.05     |
| halfcheetah-full-replay   | 0.01     |
| hopper-random             | 0.4      |
| hopper-medium             | 0.05     |
| hopper-expert             | 0.1      |
| hopper-medium-expert      | 0.1      |
| hopper-medium-replay      | 0.4      |
| hopper-full-replay        | 0.01     |
| walker2d-random           | 0.001    |
| walker2d-medium           | 0.4      |
| walker2d-expert           | 0.05     |
| walker2d-medium-expert    | 0.1      |
| walker2d-medium-replay    | 0.1      |
| walker2d-full-replay      | 0.1      |
| antmaze-umaze             | 0.4      |
| antmaze-umaze-diverse     | 0.4      |
| antmaze-medium-play       | 0.003    |
| antmaze-medium-diverse    | 0.003    |
| antmaze-large-play        | 0.003    |
| antmaze-large-diverse     | 0.003    |
| pen-human                 | 0.1      |
| pen-cloned                | 0.4      |
| pen-expert                | 0.4      |
| door-human                | 0.1      |
| door-cloned               | 0.4      |
| door-expert               | 0.1      |
| hammer-human              | 0.4      |
| hammer-cloned             | 0.4      |
| hammer-expert             | 0.4      |
| relocate-human            | 0.1      |
| relocate-cloned           | 0.1      |
| relocate-expert           | 0.4      |

Table 13: SAC-RND’s best hyperparameters used in D4RL Adroit tasks.

| Task Name       | $\beta_1$ (actor) | $\beta_2$ (critic) |
|-----------------|-------------------|--------------------|
| pen-human       | 1.0               | 10.0               |
| pen-cloned      | 2.5               | 0.01               |
| pen-expert      | 10.0              | 5.0                |
| door-human      | 5.0               | 0.01               |
| door-cloned     | 5.0               | 1.0                |
| door-expert     | 10.0              | 10.0               |
| hammer-human    | 10.0              | 0.01               |
| hammer-cloned   | 1.0               | 1.0                |
| hammer-expert   | 2.5               | 10.0               |
| relocate-human  | 5.0               | 0.01               |
| relocate-cloned | 5.0               | 1.0                |
| relocate-expert | 10.0              | 10.0               |

## 428 C Comparison to Ensemble-based Methods

429 Comparison of ReBRAC with the ensemble-based methods is presented in Table 14, Table 15, and  
 430 Table 16. We add the following ensemble-based methods: RORL for each domain (Yang et al., 2022),  
 431 SAC-N/EDAC (An et al., 2021) for the Gym-MuJoCo and Adroit tasks<sup>2</sup> and MSG (Ghasemipour  
 432 et al., 2022) for AntMaze tasks<sup>3</sup>. The mean-wise best results among algorithms are highlighted with  
 433 **bold**, and the second-best performance is underlined. Our approach, ReBRAC, shows competitive  
 434 results on the Gym-MuJoCo datasets. On AntMaze tasks, ReBRAC achieves state-of-the-art results  
 435 among ensemble-free algorithms and a good score compared to ensemble-based algorithms. And on  
 436 Adroit tasks, our approach outperforms both families of algorithms.

Table 14: ReBRAC evaluation on the Gym domain. We report the final normalized score averaged over 10 unseen training seeds on v2 datasets. CQL, SAC-N and EDAC scores are taken from An et al. (2021). RORL scores are taken from Yang et al. (2022).

| Task Name                 | Ensemble-free |              |             |              | Ensemble-based |             |             |             |
|---------------------------|---------------|--------------|-------------|--------------|----------------|-------------|-------------|-------------|
|                           | TD3+BC        | IQL          | CQL         | SAC-RND      | SAC-N          | EDAC        | RORL        | ReBRAC, our |
| halfcheetah-random        | 30.9 ± 0.4    | 19.5 ± 0.8   | 31.1 ± 3.5  | 27.6 ± 2.1   | 28.0 ± 0.9     | 28.4 ± 1.0  | 28.5 ± 0.8  | 29.5 ± 1.5  |
| halfcheetah-medium        | 54.7 ± 0.9    | 50.0 ± 0.2   | 46.9 ± 0.4  | 66.4 ± 1.4   | 67.5 ± 1.2     | 65.9 ± 0.6  | 66.8 ± 0.7  | 65.6 ± 1.0  |
| halfcheetah-expert        | 93.4 ± 0.4    | 95.5 ± 2.1   | 97.3 ± 1.1  | 102.6 ± 4.2  | 105.2 ± 2.6    | 106.8 ± 3.4 | 105.2 ± 0.7 | 105.9 ± 1.7 |
| halfcheetah-medium-expert | 89.1 ± 5.6    | 92.7 ± 2.8   | 95.0 ± 1.4  | 108.1 ± 1.5  | 107.1 ± 2.0    | 106.3 ± 1.9 | 107.8 ± 1.1 | 101.1 ± 5.2 |
| halfcheetah-medium-replay | 45.0 ± 1.1    | 42.1 ± 3.6   | 45.3 ± 0.3  | 51.2 ± 3.2   | 63.9 ± 0.8     | 61.3 ± 1.9  | 61.9 ± 1.5  | 51.0 ± 0.8  |
| halfcheetah-full-replay   | 75.0 ± 2.5    | 75.0 ± 0.7   | 76.9 ± 0.9  | 81.2 ± 1.3   | 84.5 ± 1.2     | 84.6 ± 0.9  | -           | 82.1 ± 1.1  |
| hopper-random             | 8.5 ± 0.6     | 10.1 ± 5.9   | 5.3 ± 0.6   | 19.6 ± 12.4  | 31.3 ± 0.0     | 25.3 ± 10.4 | 31.4 ± 0.1  | 8.1 ± 2.4   |
| hopper-medium             | 60.9 ± 7.6    | 65.2 ± 4.2   | 61.9 ± 6.4  | 91.1 ± 10.1  | 100.3 ± 0.3    | 101.6 ± 0.6 | 104.8 ± 0.1 | 102.0 ± 1.0 |
| hopper-expert             | 109.6 ± 3.7   | 108.8 ± 3.1  | 106.5 ± 9.1 | 109.8 ± 0.5  | 110.3 ± 0.3    | 110.1 ± 0.1 | 112.8 ± 0.2 | 100.1 ± 8.3 |
| hopper-medium-expert      | 87.8 ± 10.5   | 85.5 ± 29.7  | 96.9 ± 15.1 | 109.8 ± 0.6  | 110.1 ± 0.3    | 110.7 ± 0.1 | 112.7 ± 0.2 | 107.0 ± 6.4 |
| hopper-medium-replay      | 55.1 ± 31.7   | 89.6 ± 13.2  | 86.3 ± 7.3  | 97.2 ± 9.0   | 101.8 ± 0.5    | 101.0 ± 0.5 | 102.8 ± 0.5 | 98.1 ± 5.3  |
| hopper-full-replay        | 97.9 ± 17.5   | 104.4 ± 10.8 | 101.9 ± 0.6 | 107.4 ± 0.8  | 102.9 ± 0.3    | 105.4 ± 0.7 | -           | 107.1 ± 0.4 |
| walker2d-random           | 2.0 ± 3.6     | 11.3 ± 7.0   | 5.1 ± 1.7   | 18.7 ± 6.9   | 21.7 ± 0.0     | 16.6 ± 7.0  | 21.4 ± 0.2  | 18.1 ± 4.5  |
| walker2d-medium           | 77.7 ± 2.9    | 80.7 ± 3.4   | 79.5 ± 3.2  | 92.7 ± 1.2   | 87.9 ± 0.2     | 92.5 ± 0.8  | 102.4 ± 1.4 | 82.5 ± 3.6  |
| walker2d-expert           | 110.0 ± 0.6   | 96.9 ± 32.3  | 109.3 ± 0.1 | 104.5 ± 22.8 | 107.4 ± 2.4    | 115.1 ± 1.9 | 115.4 ± 0.5 | 112.3 ± 0.2 |
| walker2d-medium-expert    | 110.4 ± 0.6   | 112.1 ± 0.5  | 109.1 ± 0.2 | 104.6 ± 11.2 | 116.7 ± 0.4    | 114.7 ± 0.9 | 121.2 ± 1.5 | 111.6 ± 0.3 |
| walker2d-medium-replay    | 68.0 ± 19.2   | 75.4 ± 9.3   | 76.8 ± 10.0 | 89.4 ± 3.8   | 78.7 ± 0.7     | 87.1 ± 2.4  | 90.4 ± 0.5  | 77.3 ± 7.9  |
| walker2d-full-replay      | 90.3 ± 5.4    | 97.5 ± 1.4   | 94.2 ± 1.9  | 105.3 ± 3.2  | 94.6 ± 0.5     | 99.8 ± 0.7  | -           | 102.2 ± 1.7 |
| Average w/o full-replay   | 66.8          | 70.1         | 70.1        | 79.5         | 82.4           | 82.9        | 85.7        | 78.0        |
| Average                   | 70.3          | 72.9         | 73.6        | 82.6         | 84.4           | 85.2        | -           | 81.2        |

<sup>2</sup>SAC-N and EDAC score 0 on medium and large AntMaze tasks (Tarasov et al., 2022).<sup>3</sup>MSG numerical results are not available for Gym-MuJoCo tasks and Adroit tasks were not benchmarked.

Table 15: ReBRAC evaluation on AntMaze domain. We report the final normalized score averaged over 10 unseen training seeds on v2 datasets. CQL scores are taken from Ghasemipour et al. (2022). RORL scores are taken from Yang et al. (2022).

| Task Name              | Ensemble-free   |                |      |                 | Ensemble-based        |                        |                 |
|------------------------|-----------------|----------------|------|-----------------|-----------------------|------------------------|-----------------|
|                        | TD3+BC          | IQL            | CQL  | SAC-RND         | RORL                  | MSG                    | ReBRAC, our     |
| antmaze-umaze          | 66.3 $\pm$ 6.2  | 83.3 $\pm$ 4.5 | 74.0 | 97.0 $\pm$ 1.5  | 97.7 $\pm$ 1.9        | <b>97.9</b> $\pm$ 1.3  | 97.8 $\pm$ 1.0  |
| antmaze-umaze-diverse  | 53.8 $\pm$ 8.5  | 70.6 $\pm$ 3.7 | 84.0 | 66.0 $\pm$ 25.0 | <b>90.7</b> $\pm$ 2.9 | 79.3 $\pm$ 3.0         | 88.3 $\pm$ 13.0 |
| antmaze-medium-play    | 26.5 $\pm$ 18.4 | 64.6 $\pm$ 4.9 | 61.2 | 38.5 $\pm$ 29.4 | 76.3 $\pm$ 2.5        | <b>85.9</b> $\pm$ 3.9  | 84.0 $\pm$ 4.2  |
| antmaze-medium-diverse | 25.9 $\pm$ 15.3 | 61.7 $\pm$ 6.1 | 53.7 | 74.7 $\pm$ 10.7 | 69.3 $\pm$ 3.3        | <b>84.6</b> $\pm$ 5.2  | 76.3 $\pm$ 13.5 |
| antmaze-large-play     | 0.0 $\pm$ 0.0   | 42.5 $\pm$ 6.5 | 15.8 | 43.9 $\pm$ 29.2 | 16.3 $\pm$ 11.1       | <b>64.3</b> $\pm$ 12.7 | 60.4 $\pm$ 26.1 |
| antmaze-large-diverse  | 0.0 $\pm$ 0.0   | 27.6 $\pm$ 7.8 | 14.9 | 45.7 $\pm$ 28.5 | 41.0 $\pm$ 10.7       | <b>71.3</b> $\pm$ 5.3  | 54.4 $\pm$ 25.1 |
| Average                | 28.7            | 58.3           | 50.6 | 60.9            | 65.2                  | <b>80.5</b>            | 76.8            |

Table 16: ReBRAC evaluation on Adroit domain. We report the final normalized score averaged over 10 unseen training seeds on v1 datasets. BC, CQL, EDAC and RORL scores are taken from Yang et al. (2022).

| Task Name          | Ensemble-free |                        |                        |            |                 | Ensemble-based  |                       | ReBRAC, our             |
|--------------------|---------------|------------------------|------------------------|------------|-----------------|-----------------|-----------------------|-------------------------|
|                    | BC            | TD3+BC                 | IQL                    | CQL        | SAC-RND         | RORL            | EDAC                  |                         |
| pen-human          | 34.4          | 81.8 $\pm$ 14.9        | 81.5 $\pm$ 17.5        | 37.5       | 5.6 $\pm$ 5.8   | 33.7 $\pm$ 7.6  | 51.2 $\pm$ 8.6        | <b>103.5</b> $\pm$ 14.1 |
| pen-cloned         | 56.9          | 61.4 $\pm$ 19.3        | 77.2 $\pm$ 17.7        | 39.2       | 2.5 $\pm$ 6.1   | 35.7 $\pm$ 35.7 | 68.2 $\pm$ 7.3        | <b>91.8</b> $\pm$ 21.7  |
| pen-expert         | 85.1          | 146.0 $\pm$ 7.3        | 133.6 $\pm$ 16.0       | 107.0      | 45.4 $\pm$ 22.9 | 130.3 $\pm$ 4.2 | 122.8 $\pm$ 14.1      | <b>154.1</b> $\pm$ 5.4  |
| door-human         | 0.5           | -0.1 $\pm$ 0.0         | 3.1 $\pm$ 2.0          | 9.9        | 0.0 $\pm$ 0.0   | 3.7 $\pm$ 0.7   | <b>10.7</b> $\pm$ 6.8 | 0.0 $\pm$ 0.1           |
| door-cloned        | -0.1          | 0.1 $\pm$ 0.6          | 0.8 $\pm$ 1.0          | 0.4        | 0.2 $\pm$ 0.8   | -0.1 $\pm$ 0.1  | <b>9.6</b> $\pm$ 8.3  | 1.1 $\pm$ 2.6           |
| door-expert        | 34.9          | 84.6 $\pm$ 44.5        | <b>105.3</b> $\pm$ 2.8 | 101.5      | 73.6 $\pm$ 26.7 | 104.9 $\pm$ 0.9 | -0.3 $\pm$ 0.1        | 104.6 $\pm$ 2.4         |
| hammer-human       | 1.5           | 0.4 $\pm$ 0.4          | 2.5 $\pm$ 1.9          | <b>4.4</b> | -0.1 $\pm$ 0.1  | 2.3 $\pm$ 2.3   | 0.8 $\pm$ 0.4         | 0.2 $\pm$ 0.2           |
| hammer-cloned      | 0.8           | 0.8 $\pm$ 0.7          | 1.1 $\pm$ 0.5          | 2.1        | 0.1 $\pm$ 0.4   | 1.7 $\pm$ 1.7   | 0.3 $\pm$ 0.0         | <b>6.7</b> $\pm$ 3.7    |
| hammer-expert      | 125.6         | 117.0 $\pm$ 30.9       | 129.6 $\pm$ 0.5        | 86.7       | 24.8 $\pm$ 39.4 | 132.2 $\pm$ 0.7 | 0.2 $\pm$ 0.0         | <b>133.8</b> $\pm$ 0.7  |
| relocate-human     | 0.0           | -0.2 $\pm$ 0.0         | 0.1 $\pm$ 0.1          | <b>0.2</b> | 0.0 $\pm$ 0.0   | 0.0 $\pm$ 0.0   | 0.1 $\pm$ 0.1         | 0.0 $\pm$ 0.0           |
| relocate-cloned    | -0.1          | -0.1 $\pm$ 0.1         | 0.2 $\pm$ 0.4          | -0.1       | 0.0 $\pm$ 0.0   | 0.0 $\pm$ 0.0   | 0.0 $\pm$ 0.0         | <b>0.9</b> $\pm$ 1.6    |
| relocate-expert    | 101.3         | <b>107.3</b> $\pm$ 1.6 | 106.5 $\pm$ 2.5        | 95.0       | 3.4 $\pm$ 4.5   | 47.8 $\pm$ 13.5 | -0.3 $\pm$ 0.0        | 106.6 $\pm$ 3.2         |
| Average w/o expert | 11.7          | 18.0                   | <u>20.8</u>            | 11.7       | 1.0             | 9.6             | 17.4                  | <b>25.5</b>             |
| Average            | 36.7          | 49.9                   | <u>53.4</u>            | 40.3       | 12.9            | 41.0            | 21.9                  | <b>58.6</b>             |

## 437 D Computational costs

Table 17: Computational costs for algorithms in Table 2.

| Algorithm      | Number of runs | Approximate hours per run |
|----------------|----------------|---------------------------|
| TD3+BC, tuning | 360            | 0.3                       |
| IQL, tuning    | 1440           | 1.8                       |
| ReBRAC, tuning | 1440           | 0.4                       |
| TD3+BC, eval   | 180            | 0.2                       |
| IQL, eval      | 180            | 1.8                       |
| SAC-RND, eval  | 180            | 1.8                       |
| ReBRAC, eval   | 180            | 0.4                       |
| <b>Sum</b>     | 3960           | 4032.0                    |

Table 18: Computational costs for algorithms in Table 3 and Table 15.

| Algorithm      | Number of runs | Approximate hours per run |
|----------------|----------------|---------------------------|
| TD3+BC, tuning | 96             | 0.5                       |
| IQL, tuning    | 480            | 2.1                       |
| ReBRAC, tuning | 384            | 0.6                       |
| TD3+BC, eval   | 60             | 0.5                       |
| IQL, eval      | 60             | 2.0                       |
| SAC-RND, eval  | 60             | 2.9                       |
| MSG, eval      | 60             | 5.1                       |
| ReBRAC, eval   | 60             | 0.4                       |
| <b>Sum</b>     | 1260           | 1940.4                    |

Table 19: Computational costs for algorithms in Table 4.

| Algorithm       | Number of runs | Approximate hours per run |
|-----------------|----------------|---------------------------|
| TD3+BC, tuning  | 240            | 0.3                       |
| IQL, tuning     | 960            | 1.8                       |
| SAC-RND, tuning | 1200           | 1.1                       |
| ReBRAC, tuning  | 960            | 0.3                       |
| TD3+BC, eval    | 120            | 0.2                       |
| IQL, eval       | 120            | 1.9                       |
| SAC-RND, eval   | 120            | 1.1                       |
| ReBRAC, eval    | 120            | 0.3                       |
| <b>Sum</b>      | 3840           | 3828.0                    |

Table 20: Computational costs for algorithms in Table 5.

| Algorithm      | Number of runs | Approximate hours per run |
|----------------|----------------|---------------------------|
| ReBRAC, tuning | 600            | 10.6                      |
| ReBRAC, eval   | 75             | 10.5                      |
| <b>Sum</b>     | 675            | 7147.5                    |

Table 21: Computational costs for algorithms in Table 6 and Figure 2.

| Algorithm              | Number of runs | Approximate hours per run |
|------------------------|----------------|---------------------------|
| ReBRAC, ablations eval | 1104           | 1.4                       |
| <b>Sum</b>             | 1104           | 1545.6                    |



## E Expected Online Performance

Table 22: TD3+BC, IQL and ReBRAC Expected Online Performance under uniform policy selection on HalfCheetah tasks.

| Policies | random     |            |            | medium     |            |            | expert      |            |              | medium-expert |            |             | medium-replay |            |            | full-replay |            |            |
|----------|------------|------------|------------|------------|------------|------------|-------------|------------|--------------|---------------|------------|-------------|---------------|------------|------------|-------------|------------|------------|
|          | TD3+BC     | IQL        | ReBRAC     | TD3+BC     | IQL        | ReBRAC     | TD3+BC      | IQL        | ReBRAC       | TD3+BC        | IQL        | ReBRAC      | TD3+BC        | IQL        | ReBRAC     | TD3+BC      | IQL        | ReBRAC     |
| 1        | 14.6 ± 9.3 | 10.2 ± 6.8 | 17.6 ± 8.2 | 48.0 ± 5.8 | 48.0 ± 1.3 | 56.1 ± 6.3 | 59.5 ± 40.5 | 93.9 ± 4.2 | 90.7 ± 21.5  | 68.1 ± 31.4   | 87.7 ± 5.5 | 97.7 ± 6.8  | 34.7 ± 14.2   | 43.4 ± 1.3 | 47.7 ± 3.0 | 67.7 ± 12.5 | 73.1 ± 1.9 | 78.7 ± 3.3 |
| 2        | 19.8 ± 8.0 | 16.1 ± 5.9 | 21.2 ± 7.0 | 51.1 ± 5.4 | 48.8 ± 1.1 | 59.6 ± 5.8 | 80.4 ± 28.1 | 95.6 ± 1.5 | 100.8 ± 11.4 | 83.7 ± 18.1   | 90.8 ± 3.7 | 101.2 ± 3.8 | 41.5 ± 7.7    | 44.2 ± 0.8 | 49.4 ± 2.6 | 73.8 ± 7.0  | 74.1 ± 1.1 | 80.5 ± 2.6 |
| 3        | 22.5 ± 6.8 | 16.1 ± 4.6 | 24.6 ± 5.9 | 52.9 ± 5.0 | 49.1 ± 0.9 | 61.6 ± 4.9 | 88.2 ± 18.1 | 96.0 ± 0.8 | 103.6 ± 6.0  | 88.5 ± 10.1   | 92.0 ± 2.7 | 102.4 ± 2.4 | 43.6 ± 4.2    | 44.4 ± 0.6 | 50.3 ± 2.1 | 75.8 ± 4.2  | 74.5 ± 0.8 | 81.4 ± 2.0 |
| 4        | 24.7 ± 5.7 | 17.2 ± 3.6 | 26.1 ± 4.9 | 54.0 ± 4.7 | 49.4 ± 0.7 | 62.8 ± 4.2 | 91.3 ± 11.5 | 96.2 ± 0.5 | 104.7 ± 3.5  | 90.3 ± 5.9    | 92.7 ± 2.2 | 102.9 ± 1.9 | 44.5 ± 2.6    | 44.6 ± 0.4 | 50.8 ± 1.6 | 76.7 ± 3.1  | 74.7 ± 0.7 | 81.9 ± 1.6 |
| 5        | 28.3 ± 4.8 | 17.9 ± 2.8 | 27.0 ± 4.3 | 54.9 ± 4.3 | 49.5 ± 0.6 | 63.6 ± 3.5 | 92.7 ± 7.3  | 96.3 ± 0.4 | 105.2 ± 2.5  | 91.0 ± 3.6    | 93.2 ± 1.8 | 103.3 ± 1.6 | 44.9 ± 1.8    | 44.6 ± 0.4 | 51.3 ± 1.3 | 77.3 ± 2.5  | 74.9 ± 0.6 | 82.5 ± 1.2 |
| 6        | -          | 18.4 ± 2.3 | 27.7 ± 3.4 | -          | 49.6 ± 0.5 | 64.1 ± 3.0 | -           | 96.3 ± 0.3 | 105.6 ± 2.1  | -             | 93.5 ± 1.5 | 103.5 ± 1.5 | -             | 44.7 ± 0.3 | 51.3 ± 1.1 | -           | 75.0 ± 0.5 | 82.3 ± 1.0 |
| 7        | -          | 18.7 ± 1.8 | 28.1 ± 2.9 | -          | 49.7 ± 0.5 | 64.5 ± 2.6 | -           | 96.4 ± 0.3 | 105.9 ± 1.9  | -             | 93.7 ± 1.3 | 103.7 ± 1.4 | -             | 44.8 ± 0.3 | 51.4 ± 0.9 | -           | 75.0 ± 0.5 | 82.3 ± 0.8 |
| 8        | -          | 18.9 ± 1.5 | 28.5 ± 2.5 | -          | 49.7 ± 0.4 | 64.8 ± 2.3 | -           | 96.4 ± 0.3 | 106.1 ± 1.7  | -             | 93.8 ± 1.1 | 103.9 ± 1.4 | -             | 44.8 ± 0.2 | 51.5 ± 0.7 | -           | 75.1 ± 0.4 | 82.4 ± 0.7 |
| 9        | -          | 19.0 ± 1.3 | 28.7 ± 2.1 | -          | 49.7 ± 0.4 | 65.0 ± 2.0 | -           | 96.4 ± 0.2 | 106.3 ± 1.6  | -             | 93.9 ± 1.1 | 104.0 ± 1.3 | -             | 44.8 ± 0.2 | 51.6 ± 0.6 | -           | 75.1 ± 0.4 | 82.4 ± 0.6 |
| 10       | -          | 19.1 ± 1.1 | 28.9 ± 1.8 | -          | 49.7 ± 0.4 | 65.2 ± 1.7 | -           | 96.5 ± 0.2 | 106.4 ± 1.5  | -             | 94.0 ± 1.0 | 104.1 ± 1.3 | -             | 44.8 ± 0.2 | 51.7 ± 0.6 | -           | 75.2 ± 0.4 | 82.5 ± 0.6 |
| 11       | -          | 19.2 ± 0.9 | 29.0 ± 1.6 | -          | 49.9 ± 0.4 | 65.3 ± 1.5 | -           | 96.5 ± 0.2 | 106.6 ± 1.3  | -             | 94.1 ± 0.8 | 104.2 ± 1.3 | -             | 44.8 ± 0.2 | 51.7 ± 0.6 | -           | 75.2 ± 0.4 | 82.7 ± 0.5 |
| 12       | -          | 19.3 ± 0.8 | 29.2 ± 1.4 | -          | 49.9 ± 0.3 | 65.4 ± 1.3 | -           | 96.5 ± 0.2 | 106.7 ± 1.2  | -             | 94.2 ± 0.7 | 104.3 ± 1.3 | -             | 44.9 ± 0.2 | 51.7 ± 0.5 | -           | 75.2 ± 0.4 | 82.8 ± 0.4 |
| 13       | -          | 19.3 ± 0.7 | 29.2 ± 1.2 | -          | 49.9 ± 0.3 | 65.5 ± 1.1 | -           | 96.5 ± 0.2 | 106.8 ± 1.1  | -             | 94.2 ± 0.7 | 104.4 ± 1.3 | -             | 44.9 ± 0.1 | 51.8 ± 0.5 | -           | 75.3 ± 0.3 | 82.8 ± 0.4 |
| 14       | -          | 19.4 ± 0.6 | 29.3 ± 1.1 | -          | 49.9 ± 0.3 | 65.6 ± 1.0 | -           | 96.5 ± 0.1 | 106.8 ± 1.1  | -             | 94.3 ± 0.6 | 104.4 ± 1.2 | -             | 44.9 ± 0.1 | 51.8 ± 0.5 | -           | 75.3 ± 0.3 | 82.9 ± 0.3 |
| 15       | -          | 19.4 ± 0.5 | 29.4 ± 1.0 | -          | 49.9 ± 0.3 | 65.6 ± 0.9 | -           | 96.5 ± 0.1 | 106.9 ± 1.0  | -             | 94.3 ± 0.6 | 104.5 ± 1.2 | -             | 44.9 ± 0.1 | 51.9 ± 0.5 | -           | 75.3 ± 0.3 | 82.9 ± 0.3 |
| 16       | -          | 19.5 ± 0.4 | 29.5 ± 0.9 | -          | 50.0 ± 0.3 | 65.7 ± 0.8 | -           | 96.6 ± 0.1 | 107.0 ± 0.9  | -             | 94.4 ± 0.5 | 104.6 ± 1.2 | -             | 44.9 ± 0.1 | 51.9 ± 0.5 | -           | 75.4 ± 0.3 | 82.9 ± 0.2 |
| 17       | -          | 19.5 ± 0.4 | 29.5 ± 0.9 | -          | 50.0 ± 0.3 | 65.7 ± 0.7 | -           | 96.6 ± 0.1 | 107.0 ± 0.8  | -             | 94.4 ± 0.5 | 104.6 ± 1.2 | -             | 44.9 ± 0.1 | 51.9 ± 0.5 | -           | 75.3 ± 0.3 | 82.9 ± 0.3 |
| 18       | -          | 19.5 ± 0.4 | 29.5 ± 0.8 | -          | 50.0 ± 0.3 | 65.7 ± 0.6 | -           | 96.6 ± 0.1 | 107.1 ± 0.7  | -             | 94.4 ± 0.5 | 104.7 ± 1.2 | -             | 44.9 ± 0.1 | 51.9 ± 0.4 | -           | 75.4 ± 0.3 | 82.9 ± 0.2 |
| 19       | -          | 19.5 ± 0.4 | 29.6 ± 0.8 | -          | 50.0 ± 0.3 | 65.7 ± 0.5 | -           | 96.6 ± 0.1 | 107.1 ± 0.7  | -             | 94.4 ± 0.5 | 104.7 ± 1.1 | -             | 44.9 ± 0.1 | 51.9 ± 0.4 | -           | 75.4 ± 0.3 | 82.9 ± 0.2 |
| 20       | -          | 19.5 ± 0.3 | 29.6 ± 0.7 | -          | 50.0 ± 0.3 | 65.7 ± 0.5 | -           | 96.6 ± 0.1 | 107.1 ± 0.7  | -             | 94.5 ± 0.4 | 104.8 ± 1.1 | -             | 44.9 ± 0.1 | 51.9 ± 0.4 | -           | 75.4 ± 0.3 | 82.9 ± 0.2 |

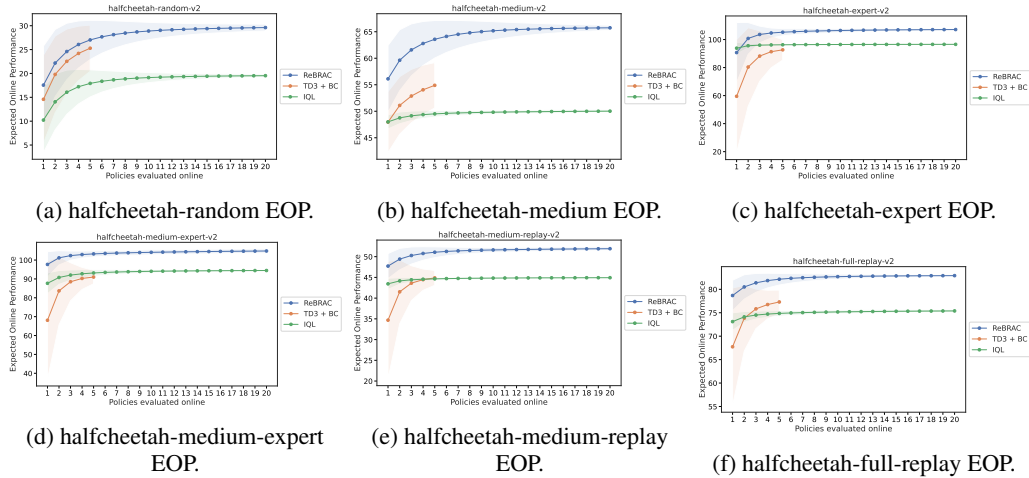

Figure 3: TD3+BC, IQL and ReBRAC visualised Expected Online Performance under uniform policy selection on HalfCheetah tasks.

Table 23: TD3+BC, IQL and ReBRAC Expected Online Performance under uniform policy selection on Hopper tasks.

| Policies | random     |            |           | medium      |            |             | expert       |              |             | medium-expert |              |              | medium-replay |             |             | full-replay  |             |             |
|----------|------------|------------|-----------|-------------|------------|-------------|--------------|--------------|-------------|---------------|--------------|--------------|---------------|-------------|-------------|--------------|-------------|-------------|
|          | TD3+BC     | IQL        | ReBRAC    | TD3+BC      | IQL        | ReBRAC      | TD3+BC       | IQL          | ReBRAC      | TD3+BC        | IQL          | ReBRAC       | TD3+BC        | IQL         | ReBRAC      | TD3+BC       | IQL         | ReBRAC      |
| 1        | 8.3 ± 4.5  | 7.5 ± 1.3  | 7.5 ± 0.9 | 39.8 ± 33.0 | 59.0 ± 4.9 | 69.5 ± 32.6 | 72.2 ± 47.1  | 96.4 ± 17.3  | 58.3 ± 40.5 | 55.0 ± 45.5   | 83.3 ± 28.4  | 58.7 ± 39.8  | 62.5 ± 14.9   | 63.8 ± 28.3 | 67.2 ± 28.4 | 68.7 ± 27.6  | 94.5 ± 20.8 | 96.7 ± 17.8 |
| 2        | 10.8 ± 4.1 | 8.1 ± 1.4  | 8.0 ± 0.5 | 37.7 ± 27.1 | 61.8 ± 3.8 | 86.6 ± 19.7 | 96.2 ± 20.3  | 105.8 ± 18.5 | 80.7 ± 30.8 | 79.3 ± 36.5   | 96.7 ± 17.5  | 81.1 ± 31.4  | 70.7 ± 16.2   | 70.9 ± 19.5 | 82.7 ± 23.8 | 82.7 ± 25.7  | 106.0 ± 9.9 | 104.2 ± 7.2 |
| 3        | 12.2 ± 3.7 | 8.4 ± 1.6  | 8.1 ± 0.4 | 66.5 ± 20.8 | 63.1 ± 3.2 | 92.8 ± 12.8 | 105.0 ± 20.6 | 109.8 ± 6.4  | 90.8 ± 22.1 | 90.9 ± 26.5   | 104.1 ± 11.8 | 91.8 ± 23.8  | 74.0 ± 7.1    | 85.2 ± 14.2 | 90.1 ± 16.6 | 92.2 ± 22.0  | 106.2 ± 4.7 | 106.2 ± 3.4 |
| 4        | 13.1 ± 3.4 | 8.7 ± 1.7  | 8.2 ± 0.3 | 71.4 ± 18.3 | 63.9 ± 1.9 | 95.9 ± 10.0 | 108.4 ± 13.0 | 110.1 ± 4.1  | 95.9 ± 16.0 | 96.3 ± 19.3   | 107.3 ± 18.2 | 97.3 ± 18.2  | 75.8 ± 5.3    | 88.8 ± 11.5 | 93.9 ± 11.8 | 97.4 ± 18.4  | 107.0 ± 2.8 | 106.8 ± 1.9 |
| 5        | 13.7 ± 3.1 | 8.9 ± 1.8  | 8.3 ± 0.2 | 74.4 ± 13.3 | 64.5 ± 2.6 | 97.7 ± 7.3  | 108.4 ± 18.2 | 111.8 ± 2.7  | 97.7 ± 11.8 | 100.2 ± 14.6  | 108.1 ± 8.3  | 101.0 ± 14.3 | 76.5 ± 4.0    | 90.8 ± 9.9  | 95.8 ± 8.4  | 100.8 ± 15.3 | 107.3 ± 1.3 | 107.2 ± 1.3 |
| 6        | -          | 9.2 ± 1.8  | 8.3 ± 0.2 | -           | 64.9 ± 2.4 | 97.8 ± 4.9  | -            | 111.4 ± 2.0  | 101.4 ± 6.9 | -             | 100.5 ± 8.5  | 101.0 ± 11.4 | -             | 92.3 ± 8.7  | 97.9 ± 8.1  | -            | 107.5 ± 1.4 | 107.4 ± 0.9 |
| 7        | -          | 9.4 ± 1.8  | 8.3 ± 0.2 | -           | 65.3 ± 2.1 | 98.6 ± 2.9  | -            | 111.4 ± 1.8  | 101.4 ± 6.9 | -             | 100.5 ± 8.5  | 101.4 ± 6.9  | -             | 92.3 ± 8.7  | 97.9 ± 8.1  | -            | 107.5 ± 1.4 | 107.4 ± 0.9 |
| 8        | -          | 9.5 ± 1.8  | 8.4 ± 0.2 | -           | 65.5 ± 2.0 | 100.2 ± 4.2 | -            | 111.4 ± 1.2  | 102.1 ± 5.5 | -             | 100.5 ± 8.5  | 101.4 ± 6.9  | -             | 94.4 ± 6.8  | 98.1 ± 3.4  | -            | 107.8 ± 0.8 | 107.5 ± 0.5 |
| 9        | -          | 9.7 ± 1.8  | 8.4 ± 0.2 | -           | 65.8 ± 1.8 | 100.6 ± 3.6 | -            | 111.9 ± 1.0  | 102.7 ± 4.6 | -             | 101.1 ± 1.4  | 101.4 ± 6.9  | -             | 95.0 ± 6.0  | 98.4 ± 2.8  | -            | 107.8 ± 0.7 | 107.4 ± 0.4 |
| 10       | -          | 9.9 ± 1.8  | 8.4 ± 0.2 | -           | 65.9 ± 1.7 | 100.9 ± 3.1 | -            | 112.0 ± 0.9  | 103.1 ± 3.9 | -             | 101.2 ± 1.2  | 101.4 ± 6.9  | -             | 95.6 ± 5.1  | 98.6 ± 2.1  | -            | 107.9 ± 0.7 | 107.6 ± 0.4 |
| 11       | -          | 10.0 ± 1.8 | 8.4 ± 0.1 | -           | 66.1 ± 1.6 | 101.2 ± 2.7 | -            | 112.0 ± 0.8  | 103.4 ± 3.5 | -             | 101.2 ± 1.2  | 101.4 ± 6.9  | -             | 96.0 ± 4.7  | 98.7 ± 1.8  | -            | 108.0 ± 0.6 | 107.7 ± 0.3 |
| 12       | -          | 10.1 ± 1.8 | 8.4 ± 0.1 | -           | 66.2 ± 1.5 | 101.3 ± 2.3 | -            | 112.1 ± 0.7  | 103.7 ± 3.2 | -             | 101.2 ± 1.2  | 101.4 ± 6.9  | -             | 96.3 ± 4.1  | 98.8 ± 1.3  | -            | 108.1 ± 0.5 | 107.7 ± 0.2 |
| 13       | -          | 10.2 ± 1.7 | 8.4 ± 0.1 | -           | 66.3 ± 1.4 | 101.5 ± 2.0 | -            | 112.2 ± 0.7  | 103.9 ± 2.9 | -             | 101.2 ± 1.2  | 101.4 ± 6.9  | -             | 96.7 ± 3.6  | 99.0 ± 1.4  | -            | 108.1 ± 0.5 | 107.7 ± 0.2 |
| 14       | -          | 10.3 ± 1.7 | 8.4 ± 0.1 | -           | 66.4 ± 1.3 | 101.6 ± 1.8 | -            | 112.2 ± 0.6  | 104.4 ± 2.8 | -             | 101.2 ± 1.2  | 101.4 ± 6.9  | -             | 96.7 ± 3.2  | 99.2 ± 1.1  | -            | 108.2 ± 0.4 | 107.7 ± 0.1 |
| 15       | -          | 10.4 ± 1.7 | 8.4 ± 0.1 | -           | 66.5 ± 1.2 | 101.7 ± 1.6 | -            | 112.2 ± 0.6  | 104.6 ± 2.4 | -             | 101.2 ± 1.2  | 101.4 ± 6.9  | -             | 97.1 ± 2.2  | 99.3 ± 1.0  | -            | 108.2 ± 0.4 | 107.7 ± 0.1 |
| 16       | -          | 10.5 ± 1.6 | 8.5 ± 0.1 | -           | 66.6 ± 1.2 | 101.8 ± 1.4 | -            | 112.3 ± 0.6  | 104.8 ± 2.5 | -             | 101.2 ± 1.2  | 101.4 ± 6.9  | -             | 97.2 ± 2.1  | 99.4 ± 0.9  | -            | 108.2 ± 0.4 | 107.7 ± 0.1 |
| 17       | -          | 10.6 ± 1.6 | 8.5 ± 0.1 | -           | 66.6 ± 1.2 | 101.9 ± 1.3 | -            | 112.3 ± 0.5  | 104.8 ± 2.4 | -             | 101.2 ± 1.2  | 101.4 ± 6.9  | -             | 97.2 ± 2.1  | 99.4 ± 0.9  | -            | 108.2 ± 0.4 | 107.7 ± 0.1 |
| 18       | -          | 10.7 ± 1.5 | 8.5 ± 0.1 | -           | 66.7 ± 1.1 | 101.9 ± 1.2 | -            | 112.3 ± 0.5  | 104.7 ± 2.3 | -             | 101.2 ± 1.2  | 101.4 ± 6.9  | -             | 97.2 ± 2.1  | 99.4 ± 0.9  | -            | 108.2 ± 0.4 | 107.7 ± 0.1 |
| 19       | -          | 10.8 ± 1.5 | 8.5 ± 0.1 | -           | 66.8 ± 1.1 | 102.0 ± 1.1 | -            | 112.4 ± 0.5  | 104.8 ± 2.2 | -             | 101.2 ± 1.2  | 101.4 ± 6.9  | -             | 97.3 ± 1.7  | 99.4 ± 0.9  | -            | 108.2 ± 0.4 | 107.7 ± 0.1 |
| 20       | -          | 10.8 ± 1.5 | 8.5 ± 0.1 | -           | 66.8 ± 1.0 | 102.0 ± 1.0 | -            | 112.4 ± 0.5  | 104.9 ± 2.1 | -             | 101.3 ± 1.6  | 101.6 ± 2.1  | -             | 97.3 ± 1.5  | 99.4 ± 0.9  | -            | 108.2 ± 0.3 | 107.7 ± 0.1 |

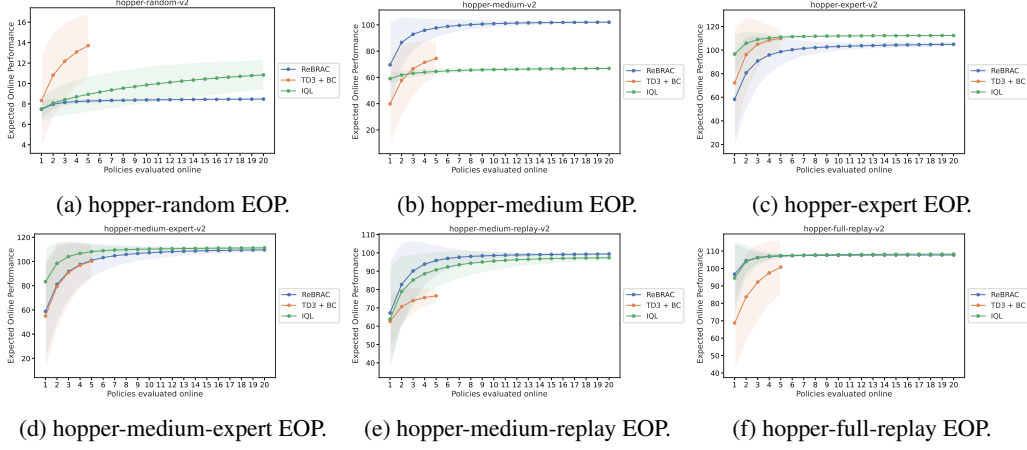

Figure 4: TD3+BC, IQL and ReBRAC visualised Expected Online Performance under uniform policy selection on Hopper tasks.

Table 24: TD3+BC, IQL and ReBRAC Expected Online Performance under uniform policy selection on Walker2d tasks.

| Policies | random    |            |            | medium       |             |             | expert       |             |              | medium-expert |              |              | medium-replay |             |             | full-replay |             |             |
|----------|-----------|------------|------------|--------------|-------------|-------------|--------------|-------------|--------------|---------------|--------------|--------------|---------------|-------------|-------------|-------------|-------------|-------------|
|          | TD3+BC    | IQL        | ReBRAC     | TD3+BC       | IQL         | ReBRAC      | TD3+BC       | IQL         | ReBRAC       | TD3+BC        | IQL          | ReBRAC       | TD3+BC        | IQL         | ReBRAC      | TD3+BC      | IQL         | ReBRAC      |
| 1        | 12 ± 10   | 6.3 ± 2.9  | 7.9 ± 6.5  | 41.3 ± 28.6  | 65.3 ± 17.8 | 51.1 ± 34.5 | 67.0 ± 52.4  | 108.3 ± 4.0 | 84.2 ± 45.7  | 70.9 ± 46.5   | 103.8 ± 12.2 | 83.2 ± 46.9  | 36.4 ± 25.2   | 51.9 ± 28.3 | 54.5 ± 26.0 | 78.9 ± 15.4 | 71.8 ± 28.7 | 86.1 ± 21.5 |
| 2        | 1.7 ± 0.8 | 7.8 ± 2.8  | 11.4 ± 4.6 | 370.0 ± 21.4 | 75.0 ± 13.0 | 75.5 ± 21.4 | 92.4 ± 39.0  | 112.1 ± 1.8 | 104.5 ± 25.1 | 94.8 ± 32.2   | 109.6 ± 4.4  | 103.8 ± 26.2 | 50.0 ± 10.0   | 67.5 ± 21.0 | 68.8 ± 18.7 | 87.1 ± 10.5 | 87.1 ± 17.9 | 96.2 ± 10.1 |
| 3        | 4.0 ± 0.7 | 8.8 ± 2.6  | 13.6 ± 6.3 | 64.7 ± 17.7  | 79.0 ± 8.7  | 79.6 ± 14.9 | 103.2 ± 26.0 | 112.7 ± 1.2 | 109.5 ± 13.0 | 103.7 ± 20.6  | 111.2 ± 3.3  | 109.2 ± 13.4 | 56.1 ± 13.8   | 74.2 ± 14.8 | 74.8 ± 13.1 | 90.3 ± 6.8  | 92.6 ± 11.1 | 99.8 ± 5.7  |
| 4        | 4.2 ± 0.6 | 9.4 ± 2.3  | 15.1 ± 5.9 | 68.9 ± 13.4  | 89.7 ± 5.8  | 82.4 ± 9.5  | 107.4 ± 16.8 | 113.6 ± 1.0 | 111.0 ± 6.5  | 107.3 ± 13.1  | 111.7 ± 1.7  | 109.7 ± 6.8  | 59.2 ± 10.5   | 77.4 ± 10.4 | 77.6 ± 8.2  | 91.6 ± 4.4  | 94.8 ± 7.2  | 100.3 ± 3.9 |
| 5        | 4.3 ± 0.4 | 9.9 ± 2.1  | 16.3 ± 5.4 | 71.3 ± 10.4  | 91.6 ± 3.9  | 83.9 ± 6.2  | 109.1 ± 10.7 | 113.2 ± 0.8 | 111.5 ± 3.4  | 108.8 ± 8.3   | 111.9 ± 0.9  | 111.2 ± 3.5  | 61.0 ± 8.5    | 79.1 ± 7.4  | 79.1 ± 6.5  | 92.3 ± 3.0  | 96.0 ± 4.8  | 101.0 ± 3.2 |
| 6        | -         | 10.5 ± 1.9 | 17.2 ± 5.0 | -            | 92.0 ± 2.7  | 84.4 ± 4.1  | -            | 113.5 ± 0.7 | 111.7 ± 1.4  | -             | 112.0 ± 0.6  | 111.4 ± 1.9  | -             | 80.5 ± 4.7  | 80.5 ± 4.7  | 96.7 ± 3.4  | 98.5 ± 2.8  | 101.5 ± 2.8 |
| 7        | -         | 10.5 ± 1.7 | 17.9 ± 4.4 | -            | 92.5 ± 1.9  | 85.0 ± 2.8  | -            | 113.4 ± 0.6 | 111.8 ± 1.1  | -             | 112.1 ± 0.4  | 111.5 ± 1.1  | -             | 80.7 ± 4.1  | 80.5 ± 3.6  | 97.0 ± 2.5  | 98.9 ± 2.5  | 101.9 ± 2.5 |
| 8        | -         | 10.7 ± 1.6 | 18.4 ± 4.2 | -            | 92.3 ± 1.3  | 85.2 ± 2.0  | -            | 113.5 ± 0.6 | 111.9 ± 0.7  | -             | 112.1 ± 0.3  | 111.6 ± 0.8  | -             | 81.1 ± 3.2  | 80.9 ± 2.9  | 97.5 ± 1.9  | 99.2 ± 2.3  | 102.1 ± 2.3 |
| 9        | -         | 10.9 ± 1.4 | 18.9 ± 3.8 | -            | 92.4 ± 0.9  | 85.3 ± 1.5  | -            | 113.6 ± 0.5 | 111.9 ± 0.6  | -             | 112.2 ± 0.3  | 111.7 ± 0.6  | -             | 81.4 ± 2.6  | 81.2 ± 2.4  | 97.4 ± 1.5  | 99.4 ± 2.0  | 102.4 ± 2.0 |
| 10       | -         | 11.0 ± 1.3 | 19.3 ± 3.5 | -            | 92.4 ± 0.7  | 85.4 ± 1.2  | -            | 113.6 ± 0.5 | 112.0 ± 0.5  | -             | 112.2 ± 0.3  | 111.7 ± 0.5  | -             | 81.6 ± 2.1  | 81.4 ± 2.1  | 97.5 ± 1.2  | 99.5 ± 1.8  | 102.5 ± 1.8 |
| 11       | -         | 11.1 ± 1.3 | 19.6 ± 3.2 | -            | 92.4 ± 0.5  | 85.5 ± 1.0  | -            | 113.6 ± 0.4 | 112.0 ± 0.4  | -             | 112.2 ± 0.3  | 111.7 ± 0.4  | -             | 81.8 ± 1.9  | 81.5 ± 1.9  | 97.6 ± 1.0  | 99.7 ± 1.6  | 102.7 ± 1.6 |
| 12       | -         | 11.2 ± 1.2 | 19.9 ± 3.0 | -            | 92.5 ± 0.3  | 85.6 ± 0.8  | -            | 113.7 ± 0.4 | 112.0 ± 0.4  | -             | 112.2 ± 0.3  | 111.8 ± 0.5  | -             | 81.9 ± 1.7  | 81.7 ± 1.8  | 97.7 ± 0.9  | 99.8 ± 1.4  | 102.8 ± 1.4 |
| 13       | -         | 11.3 ± 1.1 | 20.1 ± 2.8 | -            | 92.5 ± 0.3  | 85.6 ± 0.8  | -            | 113.7 ± 0.4 | 112.0 ± 0.3  | -             | 112.3 ± 0.2  | 111.8 ± 0.3  | -             | 82.0 ± 1.5  | 81.8 ± 1.7  | 97.8 ± 0.7  | 99.9 ± 1.3  | 102.9 ± 1.3 |
| 14       | -         | 11.4 ± 1.0 | 20.2 ± 2.6 | -            | 92.5 ± 0.2  | 85.7 ± 0.7  | -            | 113.7 ± 0.3 | 112.1 ± 0.3  | -             | 112.3 ± 0.2  | 111.8 ± 0.3  | -             | 82.1 ± 1.4  | 81.9 ± 1.6  | 97.8 ± 0.7  | 100.0 ± 1.2 | 103.0 ± 1.2 |
| 15       | -         | 11.5 ± 1.0 | 20.4 ± 2.4 | -            | 92.5 ± 0.1  | 85.7 ± 0.7  | -            | 113.7 ± 0.3 | 112.1 ± 0.2  | -             | 112.3 ± 0.2  | 111.8 ± 0.3  | -             | 82.2 ± 1.3  | 82.0 ± 1.6  | 97.9 ± 0.6  | 100.1 ± 1.1 | 103.1 ± 1.1 |
| 16       | -         | 11.5 ± 0.9 | 20.6 ± 2.2 | -            | 92.5 ± 0.1  | 85.8 ± 0.6  | -            | 113.8 ± 0.3 | 112.1 ± 0.2  | -             | 112.3 ± 0.2  | 111.8 ± 0.2  | -             | 82.3 ± 1.2  | 82.1 ± 1.5  | 97.9 ± 0.5  | 100.1 ± 0.9 | 103.1 ± 0.9 |
| 17       | -         | 11.6 ± 0.9 | 20.7 ± 2.1 | -            | 92.5 ± 0.1  | 85.8 ± 0.6  | -            | 113.8 ± 0.3 | 112.1 ± 0.2  | -             | 112.3 ± 0.2  | 111.9 ± 0.2  | -             | 82.4 ± 1.2  | 82.2 ± 1.4  | 97.9 ± 0.5  | 100.1 ± 0.8 | 103.1 ± 0.8 |
| 18       | -         | 11.6 ± 0.8 | 20.8 ± 1.9 | -            | 92.5 ± 0.1  | 85.8 ± 0.6  | -            | 113.8 ± 0.3 | 112.1 ± 0.2  | -             | 112.3 ± 0.2  | 111.9 ± 0.2  | -             | 82.4 ± 1.1  | 82.3 ± 1.4  | 97.9 ± 0.5  | 100.2 ± 0.8 | 103.2 ± 0.8 |
| 19       | -         | 11.7 ± 0.8 | 20.9 ± 1.8 | -            | 92.5 ± 0.1  | 85.9 ± 0.6  | -            | 113.8 ± 0.2 | 112.1 ± 0.1  | -             | 112.3 ± 0.2  | 111.9 ± 0.2  | -             | 82.5 ± 1.0  | 82.3 ± 1.3  | 98.0 ± 0.4  | 100.2 ± 0.7 | 103.2 ± 0.7 |
| 20       | -         | 11.7 ± 0.7 | 21.0 ± 1.7 | -            | 92.5 ± 0.1  | 85.9 ± 0.5  | -            | 113.8 ± 0.2 | 112.1 ± 0.1  | -             | 112.3 ± 0.2  | 111.9 ± 0.2  | -             | 82.5 ± 1.0  | 82.4 ± 1.3  | 98.0 ± 0.4  | 100.2 ± 0.6 | 103.2 ± 0.6 |

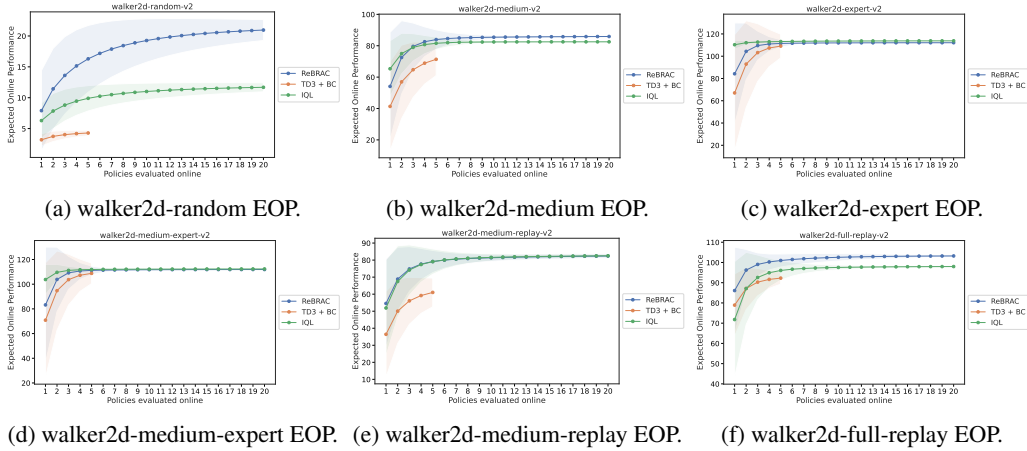

Figure 5: TD3+BC, IQL and ReBRAC visualised Expected Online Performance under uniform policy selection on Walker2d tasks.

Table 25: TD3+BC, IQL and ReBRAC Expected Online Performance under uniform policy selection on AntMaze tasks.

| Policies | umaze       |             |                    | medium-play |             |                    | large-play |             |                    | umaze-diverse |             |                    | medium-diverse |             |                    | large-diverse |             |                    |
|----------|-------------|-------------|--------------------|-------------|-------------|--------------------|------------|-------------|--------------------|---------------|-------------|--------------------|----------------|-------------|--------------------|---------------|-------------|--------------------|
|          | TD3+BC      | IQL         | ReBRAC             | TD3+BC      | IQL         | ReBRAC             | TD3+BC     | IQL         | ReBRAC             | TD3+BC        | IQL         | ReBRAC             | TD3+BC         | IQL         | ReBRAC             | TD3+BC        | IQL         | ReBRAC             |
| 1        | 12.4 ± 24.8 | 64.3 ± 12.0 | <b>87.5 ± 10.9</b> | 7.5 ± 11.7  | 22.7 ± 20.5 | <b>75.0 ± 14.8</b> | 0.0 ± 0.0  | 80.9 ± 16.2 | <b>52.7 ± 21.4</b> | 9.6 ± 19.2    | 52.8 ± 11.1 | <b>78.4 ± 16.2</b> | 11.9 ± 13.8    | 21.3 ± 26.8 | <b>65.3 ± 26.3</b> | 0.2 ± 0.2     | 6.7 ± 10.3  | <b>56.8 ± 17.0</b> |
| 2        | 23.3 ± 20.9 | 71.1 ± 9.2  | <b>93.2 ± 4.2</b>  | 13.0 ± 13.3 | 37.5 ± 30.9 | <b>82.7 ± 8.9</b>  | 0.0 ± 0.0  | 88.6 ± 17.3 | <b>64.1 ± 13.0</b> | 17.3 ± 23.0   | 58.7 ± 11.3 | <b>79.3 ± 11.2</b> | 10.2 ± 14.0    | 33.0 ± 27.7 | <b>73.2 ± 16.0</b> | 0.3 ± 0.2     | 11.6 ± 11.6 | <b>66.2 ± 10.3</b> |
| 3        | 30.3 ± 31.0 | 74.3 ± 7.5  | <b>95.1 ± 2.7</b>  | 17.0 ± 13.2 | 47.4 ± 28.5 | <b>85.4 ± 5.7</b>  | 0.0 ± 0.0  | 24.0 ± 16.9 | <b>68.5 ± 9.3</b>  | 23.4 ± 24.0   | 62.5 ± 10.4 | <b>83.1 ± 8.4</b>  | 23.8 ± 12.7    | 44.0 ± 25.1 | <b>84.2 ± 9.8</b>  | 0.4 ± 0.2     | 15.2 ± 11.4 | <b>78.3 ± 8.5</b>  |
| 4        | 36.6 ± 30.5 | 76.2 ± 6.5  | <b>96.0 ± 2.4</b>  | 20.0 ± 12.6 | 54.1 ± 25.0 | <b>86.7 ± 4.2</b>  | 0.0 ± 0.0  | 27.9 ± 15.3 | <b>70.6 ± 7.3</b>  | 28.3 ± 21.6   | 63.1 ± 9.3  | <b>85.2 ± 6.0</b>  | 26.9 ± 11.1    | 50.0 ± 21.7 | <b>86.4 ± 6.6</b>  | 0.4 ± 0.2     | 17.9 ± 10.6 | <b>72.2 ± 7.8</b>  |
| 5        | 41.7 ± 29.1 | 77.5 ± 5.9  | <b>96.4 ± 1.8</b>  | 22.2 ± 11.7 | 58.7 ± 21.4 | <b>87.5 ± 3.5</b>  | 0.0 ± 0.0  | 30.8 ± 13.6 | <b>72.3 ± 6.0</b>  | 32.3 ± 22.5   | 67.0 ± 8.2  | <b>86.5 ± 6.3</b>  | 29.0 ± 9.7     | 54.0 ± 18.4 | <b>87.6 ± 4.9</b>  | 0.5 ± 0.1     | 19.9 ± 9.7  | <b>73.5 ± 6.2</b>  |
| 6        | -           | 78.4 ± 5.4  | <b>96.7 ± 1.4</b>  | -           | 61.9 ± 18.2 | <b>88.1 ± 3.2</b>  | -          | 32.8 ± 11.8 | <b>73.1 ± 4.9</b>  | -             | 68.4 ± 7.3  | <b>87.8 ± 5.7</b>  | -              | 58.8 ± 15.4 | <b>88.4 ± 3.9</b>  | -             | 21.3 ± 8.8  | <b>74.2 ± 5.7</b>  |
| 7        | -           | 79.2 ± 4.9  | <b>96.9 ± 1.1</b>  | -           | 64.1 ± 15.3 | <b>88.5 ± 2.9</b>  | -          | 34.3 ± 10.3 | <b>73.7 ± 4.1</b>  | -             | 68.4 ± 6.4  | <b>88.4 ± 5.3</b>  | -              | 58.8 ± 12.9 | <b>88.9 ± 3.2</b>  | -             | 22.7 ± 8.0  | <b>75.3 ± 5.4</b>  |
| 8        | -           | 79.8 ± 4.6  | <b>97.0 ± 0.9</b>  | -           | 65.7 ± 12.3 | <b>88.9 ± 2.7</b>  | -          | 35.5 ± 8.9  | <b>74.2 ± 3.3</b>  | -             | 68.2 ± 5.7  | <b>89.0 ± 4.9</b>  | -              | 60.1 ± 10.7 | <b>89.3 ± 2.8</b>  | -             | 23.7 ± 7.2  | <b>75.9 ± 5.1</b>  |
| 9        | -           | 80.3 ± 4.3  | <b>97.1 ± 0.7</b>  | -           | 66.8 ± 10.7 | <b>89.2 ± 2.5</b>  | -          | 36.3 ± 7.7  | <b>74.5 ± 2.9</b>  | -             | 70.8 ± 5.1  | <b>89.5 ± 4.5</b>  | -              | 61.1 ± 9.0  | <b>89.6 ± 2.4</b>  | -             | 24.4 ± 6.5  | <b>76.5 ± 4.9</b>  |
| 10       | -           | 80.7 ± 4.0  | <b>97.1 ± 0.6</b>  | -           | 67.6 ± 9.0  | <b>89.4 ± 2.4</b>  | -          | 37.0 ± 6.7  | <b>74.8 ± 2.5</b>  | -             | 71.3 ± 4.6  | <b>89.9 ± 4.2</b>  | -              | 61.8 ± 7.5  | <b>89.8 ± 2.1</b>  | -             | 25.1 ± 5.9  | <b>76.9 ± 4.7</b>  |
| 11       | -           | 81.1 ± 3.8  | <b>97.2 ± 0.6</b>  | -           | 68.2 ± 7.5  | <b>89.6 ± 2.2</b>  | -          | 37.5 ± 5.9  | <b>75.0 ± 2.1</b>  | -             | 71.7 ± 4.2  | <b>90.1 ± 3.9</b>  | -              | 62.4 ± 6.3  | <b>90.0 ± 1.9</b>  | -             | 25.6 ± 5.4  | <b>77.3 ± 4.6</b>  |
| 12       | -           | 81.4 ± 3.5  | <b>97.2 ± 0.5</b>  | -           | 68.7 ± 6.3  | <b>89.8 ± 2.1</b>  | -          | 37.9 ± 5.2  | <b>75.1 ± 1.8</b>  | -             | 72.0 ± 3.8  | <b>90.6 ± 3.6</b>  | -              | 62.8 ± 5.3  | <b>90.1 ± 1.6</b>  | -             | 26.0 ± 4.9  | <b>77.7 ± 4.4</b>  |
| 13       | -           | 81.6 ± 3.3  | <b>97.3 ± 0.4</b>  | -           | 69.0 ± 5.2  | <b>90.0 ± 2.0</b>  | -          | 38.2 ± 4.6  | <b>75.2 ± 1.6</b>  | -             | 72.3 ± 3.5  | <b>90.9 ± 3.3</b>  | -              | 63.0 ± 4.5  | <b>90.3 ± 1.5</b>  | -             | 26.4 ± 4.5  | <b>78.0 ± 4.3</b>  |
| 14       | -           | 81.9 ± 3.1  | <b>97.3 ± 0.4</b>  | -           | 69.2 ± 4.4  | <b>90.1 ± 1.9</b>  | -          | 38.5 ± 4.2  | <b>75.3 ± 1.4</b>  | -             | 72.6 ± 3.2  | <b>91.1 ± 3.1</b>  | -              | 63.3 ± 3.8  | <b>90.4 ± 1.3</b>  | -             | 26.7 ± 4.2  | <b>78.3 ± 4.1</b>  |
| 15       | -           | 82.1 ± 3.0  | <b>97.3 ± 0.4</b>  | -           | 69.4 ± 3.7  | <b>90.2 ± 1.8</b>  | -          | 38.8 ± 3.8  | <b>75.4 ± 1.2</b>  | -             | 72.8 ± 3.0  | <b>91.3 ± 2.9</b>  | -              | 63.5 ± 3.2  | <b>90.4 ± 1.2</b>  | -             | 27.0 ± 3.9  | <b>78.6 ± 4.0</b>  |
| 16       | -           | 82.2 ± 2.8  | <b>97.3 ± 0.3</b>  | -           | 69.5 ± 3.1  | <b>90.3 ± 1.7</b>  | -          | 39.0 ± 3.5  | <b>75.4 ± 1.1</b>  | -             | 72.9 ± 2.8  | <b>91.4 ± 2.7</b>  | -              | 63.6 ± 2.8  | <b>90.5 ± 1.1</b>  | -             | 27.2 ± 3.6  | <b>78.7 ± 3.9</b>  |
| 17       | -           | 82.4 ± 2.7  | -                  | -           | 69.6 ± 2.6  | -                  | -          | 39.1 ± 3.3  | -                  | -             | 73.1 ± 2.7  | -                  | -              | 63.7 ± 2.4  | -                  | -             | 27.4 ± 3.4  | -                  |
| 18       | -           | 82.5 ± 2.5  | -                  | -           | 69.7 ± 2.2  | -                  | -          | 39.3 ± 3.1  | -                  | -             | 73.2 ± 2.5  | -                  | -              | 63.8 ± 2.1  | -                  | -             | 27.6 ± 3.2  | -                  |
| 19       | -           | 82.7 ± 2.4  | -                  | -           | 69.8 ± 1.9  | -                  | -          | 39.4 ± 2.9  | -                  | -             | 73.4 ± 2.4  | -                  | -              | 63.9 ± 1.8  | -                  | -             | 27.7 ± 3.0  | -                  |
| 20       | -           | 82.8 ± 2.3  | -                  | -           | 69.8 ± 1.6  | -                  | -          | 39.6 ± 2.8  | -                  | -             | 73.5 ± 2.3  | -                  | -              | 64.0 ± 1.6  | -                  | -             | 27.9 ± 2.9  | -                  |

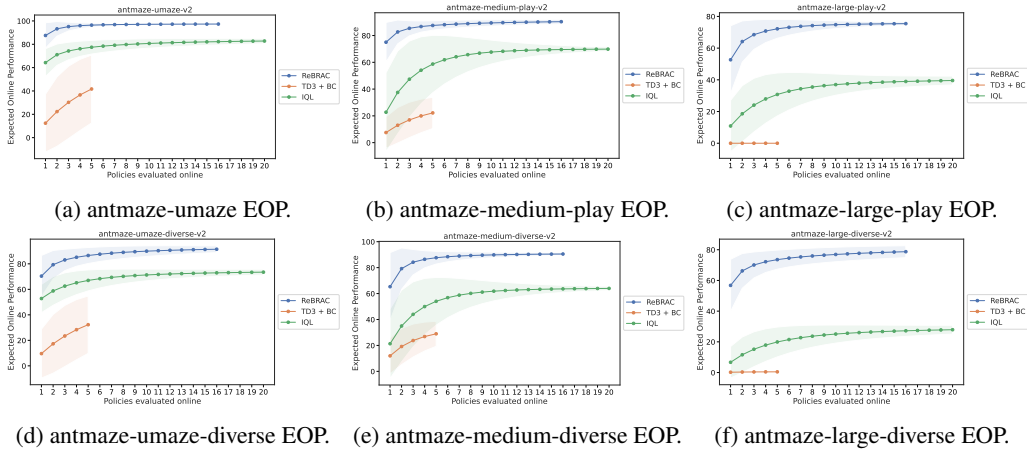

Figure 6: TD3+BC, IQL and ReBRAC visualised Expected Online Performance under uniform policy selection on AntMaze tasks.

Table 26: TD3+BC, IQL and ReBRAC Expected Online Performance under uniform policy selection on Pen tasks.

| Policies | human       |                   |                    | cloned      |                   |                    | expert       |             |                     |
|----------|-------------|-------------------|--------------------|-------------|-------------------|--------------------|--------------|-------------|---------------------|
|          | TD3+BC      | IQL               | ReBRAC             | TD3+BC      | IQL               | ReBRAC             | TD3+BC       | IQL         | ReBRAC              |
| 1        | 42.9 ± 32.0 | <b>87.1 ± 4.1</b> | 69.9 ± 28.2        | 33.6 ± 23.2 | <b>73.8 ± 5.8</b> | 65.8 ± 32.7        | 73.9 ± 65.2  | 130.1 ± 2.8 | <b>136.9 ± 25.4</b> |
| 2        | 60.4 ± 25.4 | <b>89.4 ± 2.9</b> | 85.8 ± 20.7        | 44.9 ± 25.4 | 76.7 ± 4.8        | <b>83.6 ± 21.8</b> | 108.9 ± 52.9 | 131.7 ± 2.1 | <b>149.0 ± 13.6</b> |
| 3        | 68.7 ± 18.9 | 90.3 ± 2.5        | <b>92.8 ± 14.8</b> | 52.6 ± 25.2 | 78.0 ± 4.9        | <b>90.8 ± 15.4</b> | 125.6 ± 38.7 | 132.4 ± 1.8 | <b>152.4 ± 7.0</b>  |
| 4        | 73.0 ± 14.2 | 90.9 ± 2.2        | <b>96.3 ± 10.9</b> | 58.1 ± 24.1 | 79.0 ± 5.2        | <b>94.6 ± 12.2</b> | 134.1 ± 27.8 | 132.8 ± 1.6 | <b>153.5 ± 3.8</b>  |
| 5        | 75.6 ± 11.2 | 91.4 ± 2.0        | <b>98.4 ± 8.3</b>  | 62.3 ± 22.6 | 79.7 ± 5.4        | <b>97.0 ± 10.4</b> | 138.5 ± 20.0 | 133.1 ± 1.5 | <b>154.1 ± 2.2</b>  |
| 6        | -           | 91.7 ± 1.8        | <b>99.7 ± 6.5</b>  | -           | 80.3 ± 5.5        | <b>98.7 ± 9.3</b>  | -            | 133.4 ± 1.4 | <b>154.3 ± 1.5</b>  |
| 7        | -           | 92.0 ± 1.7        | <b>100.5 ± 5.2</b> | -           | 80.9 ± 5.6        | <b>100.0 ± 8.4</b> | -            | 133.6 ± 1.3 | <b>154.5 ± 1.1</b>  |
| 8        | -           | 92.2 ± 1.6        | <b>101.1 ± 4.4</b> | -           | 81.4 ± 5.7        | <b>101.1 ± 7.6</b> | -            | 133.7 ± 1.2 | <b>154.7 ± 0.9</b>  |
| 9        | -           | 92.3 ± 1.4        | <b>101.6 ± 3.7</b> | -           | 81.9 ± 5.8        | <b>101.9 ± 7.0</b> | -            | 133.9 ± 1.1 | <b>154.8 ± 0.8</b>  |
| 10       | -           | 92.5 ± 1.3        | <b>101.9 ± 3.3</b> | -           | 82.3 ± 5.9        | <b>102.6 ± 6.4</b> | -            | 134.0 ± 1.0 | <b>154.8 ± 0.7</b>  |
| 11       | -           | 92.6 ± 1.2        | <b>102.2 ± 2.9</b> | -           | 82.7 ± 5.9        | <b>103.1 ± 5.9</b> | -            | 134.1 ± 0.9 | <b>154.9 ± 0.6</b>  |
| 12       | -           | 92.7 ± 1.2        | <b>102.4 ± 2.6</b> | -           | 83.0 ± 5.9        | <b>103.6 ± 5.4</b> | -            | 134.1 ± 0.9 | <b>154.9 ± 0.6</b>  |
| 13       | -           | 92.8 ± 1.1        | <b>102.6 ± 2.4</b> | -           | 83.4 ± 5.9        | <b>104.0 ± 5.0</b> | -            | 134.2 ± 0.8 | <b>155.0 ± 0.5</b>  |
| 14       | -           | 92.9 ± 1.0        | <b>102.8 ± 2.2</b> | -           | 83.7 ± 5.9        | <b>104.4 ± 4.6</b> | -            | 134.2 ± 0.7 | <b>155.0 ± 0.5</b>  |
| 15       | -           | 92.9 ± 1.0        | <b>102.9 ± 2.0</b> | -           | 84.0 ± 5.8        | <b>104.7 ± 4.3</b> | -            | 134.3 ± 0.7 | <b>155.0 ± 0.4</b>  |
| 16       | -           | 93.0 ± 0.9        | <b>103.0 ± 1.8</b> | -           | 84.3 ± 5.8        | <b>104.9 ± 4.0</b> | -            | 134.3 ± 0.6 | <b>155.1 ± 0.4</b>  |
| 17       | -           | 93.0 ± 0.9        | <b>103.1 ± 1.7</b> | -           | 84.6 ± 5.7        | <b>105.1 ± 3.8</b> | -            | 134.4 ± 0.6 | <b>155.1 ± 0.4</b>  |
| 18       | -           | 93.1 ± 0.8        | <b>103.2 ± 1.6</b> | -           | 84.8 ± 5.7        | <b>105.3 ± 3.5</b> | -            | 134.4 ± 0.6 | <b>155.1 ± 0.4</b>  |
| 19       | -           | 93.1 ± 0.8        | <b>103.3 ± 1.4</b> | -           | 85.0 ± 5.6        | <b>105.5 ± 3.3</b> | -            | 134.4 ± 0.5 | <b>155.1 ± 0.4</b>  |
| 20       | -           | 93.2 ± 0.8        | <b>103.3 ± 1.3</b> | -           | 85.3 ± 5.5        | <b>105.7 ± 3.1</b> | -            | 134.5 ± 0.5 | <b>155.1 ± 0.4</b>  |

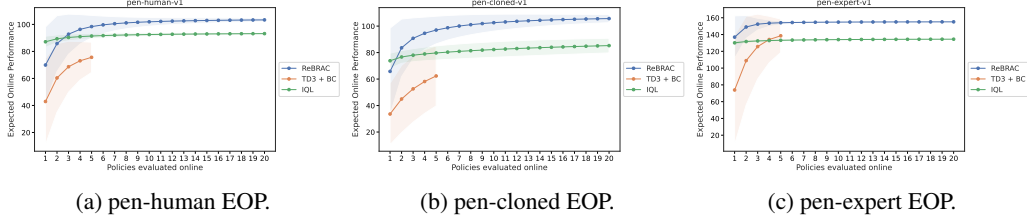

Figure 7: TD3+BC, IQL and ReBRAC visualised Expected Online Performance under uniform policy selection on Pen tasks.

Table 27: TD3+BC, IQL and ReBRAC Expected Online Performance under uniform policy selection on Door tasks.

| Policies | human      |                  |            | cloned     |                  |                  | expert      |                    |              |
|----------|------------|------------------|------------|------------|------------------|------------------|-------------|--------------------|--------------|
|          | TD3+BC     | IQL              | ReBRAC     | TD3+BC     | IQL              | ReBRAC           | TD3+BC      | IQL                | ReBRAC       |
| 1        | -0.2 ± 0.1 | <b>4.4 ± 1.2</b> | -0.1 ± 0.1 | -0.1 ± 0.3 | <b>1.6 ± 0.8</b> | 0.3 ± 0.9        | 50.7 ± 46.3 | <b>102.1 ± 5.7</b> | 75.4 ± 43.0  |
| 2        | -0.1 ± 0.1 | <b>5.0 ± 1.0</b> | -0.0 ± 0.1 | 0.0 ± 0.3  | <b>2.0 ± 0.6</b> | 0.6 ± 1.2        | 75.6 ± 39.5 | <b>104.7 ± 2.5</b> | 96.1 ± 25.0  |
| 3        | -0.1 ± 0.1 | <b>5.4 ± 1.0</b> | -0.0 ± 0.0 | 0.1 ± 0.3  | <b>2.2 ± 0.5</b> | 0.8 ± 1.4        | 88.2 ± 30.4 | <b>105.4 ± 1.3</b> | 102.3 ± 13.5 |
| 4        | -0.1 ± 0.1 | <b>5.6 ± 0.9</b> | -0.0 ± 0.0 | 0.2 ± 0.3  | <b>2.4 ± 0.4</b> | 1.0 ± 1.6        | 94.9 ± 22.9 | <b>105.7 ± 0.8</b> | 104.4 ± 7.3  |
| 5        | -0.1 ± 0.1 | <b>5.8 ± 0.9</b> | -0.0 ± 0.0 | 0.2 ± 0.3  | <b>2.5 ± 0.4</b> | 1.2 ± 1.7        | 98.6 ± 17.2 | <b>105.8 ± 0.6</b> | 105.2 ± 4.1  |
| 6        | -          | <b>5.9 ± 0.9</b> | 0.0 ± 0.0  | -          | <b>2.5 ± 0.3</b> | 1.3 ± 1.8        | -           | <b>105.9 ± 0.5</b> | 105.6 ± 2.4  |
| 7        | -          | <b>6.0 ± 0.9</b> | 0.0 ± 0.0  | -          | <b>2.6 ± 0.3</b> | 1.5 ± 1.8        | -           | <b>106.0 ± 0.5</b> | 105.8 ± 1.5  |
| 8        | -          | <b>6.1 ± 0.8</b> | 0.0 ± 0.0  | -          | <b>2.6 ± 0.3</b> | 1.6 ± 1.9        | -           | <b>106.1 ± 0.4</b> | 105.9 ± 1.0  |
| 9        | -          | <b>6.2 ± 0.8</b> | 0.0 ± 0.0  | -          | <b>2.6 ± 0.2</b> | 1.8 ± 1.9        | -           | <b>106.1 ± 0.4</b> | 105.9 ± 0.7  |
| 10       | -          | <b>6.3 ± 0.8</b> | 0.0 ± 0.0  | -          | <b>2.7 ± 0.2</b> | 1.9 ± 1.9        | -           | <b>106.1 ± 0.4</b> | 106.0 ± 0.5  |
| 11       | -          | <b>6.4 ± 0.8</b> | 0.0 ± 0.0  | -          | <b>2.7 ± 0.2</b> | 2.0 ± 2.0        | -           | <b>106.2 ± 0.4</b> | 106.0 ± 0.4  |
| 12       | -          | <b>6.4 ± 0.7</b> | 0.0 ± 0.0  | -          | <b>2.7 ± 0.2</b> | 2.2 ± 2.0        | -           | <b>106.2 ± 0.3</b> | 106.0 ± 0.3  |
| 13       | -          | <b>6.5 ± 0.7</b> | 0.0 ± 0.0  | -          | <b>2.7 ± 0.2</b> | 2.3 ± 2.0        | -           | <b>106.2 ± 0.3</b> | 106.0 ± 0.2  |
| 14       | -          | <b>6.5 ± 0.7</b> | 0.0 ± 0.0  | -          | <b>2.7 ± 0.2</b> | 2.4 ± 2.0        | -           | <b>106.2 ± 0.3</b> | 106.0 ± 0.2  |
| 15       | -          | <b>6.6 ± 0.7</b> | 0.0 ± 0.0  | -          | <b>2.7 ± 0.2</b> | 2.5 ± 2.0        | -           | <b>106.3 ± 0.3</b> | 106.0 ± 0.2  |
| 16       | -          | <b>6.6 ± 0.6</b> | 0.0 ± 0.0  | -          | <b>2.7 ± 0.2</b> | 2.6 ± 1.9        | -           | <b>106.3 ± 0.3</b> | 106.1 ± 0.2  |
| 17       | -          | <b>6.6 ± 0.6</b> | 0.0 ± 0.0  | -          | <b>2.8 ± 0.2</b> | 2.7 ± 1.9        | -           | <b>106.3 ± 0.3</b> | 106.1 ± 0.2  |
| 18       | -          | <b>6.7 ± 0.6</b> | 0.0 ± 0.0  | -          | <b>2.8 ± 0.2</b> | 2.7 ± 1.9        | -           | <b>106.3 ± 0.3</b> | 106.1 ± 0.1  |
| 19       | -          | <b>6.7 ± 0.6</b> | 0.0 ± 0.0  | -          | <b>2.8 ± 0.2</b> | <b>2.8 ± 1.9</b> | -           | <b>106.3 ± 0.3</b> | 106.1 ± 0.1  |
| 20       | -          | <b>6.7 ± 0.5</b> | 0.0 ± 0.0  | -          | <b>2.8 ± 0.2</b> | <b>2.9 ± 1.9</b> | -           | <b>106.3 ± 0.2</b> | 106.1 ± 0.1  |

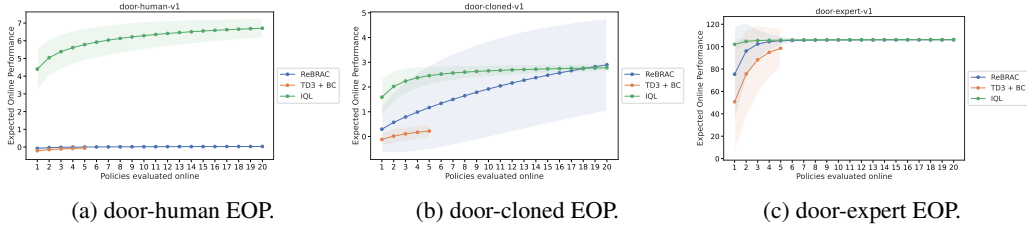

Figure 8: TD3+BC, IQL and ReBRAC visualised Expected Online Performance under uniform policy selection on Door tasks.

Table 28: TD3+BC, IQL and ReBRAC Expected Online Performance under uniform policy selection on Hammer tasks.

| Policies | human     |                  |           | cloned    |           |                   | expert       |                    |                     |
|----------|-----------|------------------|-----------|-----------|-----------|-------------------|--------------|--------------------|---------------------|
|          | TD3+BC    | IQL              | ReBRAC    | TD3+BC    | IQL       | ReBRAC            | TD3+BC       | IQL                | ReBRAC              |
| 1        | 0.2 ± 0.0 | <b>1.6 ± 0.4</b> | 0.3 ± 0.2 | 1.1 ± 0.8 | 1.9 ± 1.1 | <b>4.5 ± 5.5</b>  | 60.2 ± 55.4  | <b>128.7 ± 1.1</b> | 101.9 ± 49.9        |
| 2        | 0.3 ± 0.0 | <b>1.8 ± 0.4</b> | 0.3 ± 0.2 | 1.6 ± 0.8 | 2.5 ± 1.1 | <b>7.3 ± 6.1</b>  | 90.0 ± 48.4  | <b>129.3 ± 0.9</b> | 124.3 ± 26.8        |
| 3        | 0.3 ± 0.0 | <b>1.9 ± 0.4</b> | 0.4 ± 0.2 | 1.8 ± 0.7 | 2.8 ± 1.0 | <b>9.2 ± 6.2</b>  | 105.7 ± 38.1 | 129.6 ± 0.7        | <b>130.1 ± 13.6</b> |
| 4        | 0.3 ± 0.0 | <b>2.0 ± 0.4</b> | 0.4 ± 0.2 | 2.0 ± 0.6 | 3.1 ± 0.9 | <b>10.6 ± 6.2</b> | 114.3 ± 29.3 | 129.7 ± 0.5        | <b>131.9 ± 7.0</b>  |
| 5        | 0.3 ± 0.0 | <b>2.1 ± 0.4</b> | 0.5 ± 0.2 | 2.1 ± 0.6 | 3.3 ± 0.9 | <b>11.7 ± 6.2</b> | 119.2 ± 22.4 | 129.8 ± 0.4        | <b>132.6 ± 3.8</b>  |
| 6        | -         | <b>2.1 ± 0.4</b> | 0.5 ± 0.2 | -         | 3.4 ± 0.8 | <b>12.6 ± 6.1</b> | -            | 129.9 ± 0.3        | <b>133.0 ± 2.4</b>  |
| 7        | -         | <b>2.2 ± 0.4</b> | 0.5 ± 0.2 | -         | 3.5 ± 0.7 | <b>13.3 ± 6.0</b> | -            | 129.9 ± 0.2        | <b>133.2 ± 1.7</b>  |
| 8        | -         | <b>2.2 ± 0.4</b> | 0.5 ± 0.2 | -         | 3.6 ± 0.7 | <b>14.0 ± 5.9</b> | -            | 129.9 ± 0.2        | <b>133.4 ± 1.4</b>  |
| 9        | -         | <b>2.3 ± 0.3</b> | 0.6 ± 0.2 | -         | 3.7 ± 0.6 | <b>14.6 ± 5.8</b> | -            | 130.0 ± 0.1        | <b>133.5 ± 1.2</b>  |
| 10       | -         | <b>2.3 ± 0.3</b> | 0.6 ± 0.2 | -         | 3.7 ± 0.6 | <b>15.1 ± 5.7</b> | -            | 130.0 ± 0.1        | <b>133.6 ± 1.1</b>  |
| 11       | -         | <b>2.3 ± 0.3</b> | 0.6 ± 0.1 | -         | 3.8 ± 0.5 | <b>15.5 ± 5.6</b> | -            | 130.0 ± 0.1        | <b>133.7 ± 1.0</b>  |
| 12       | -         | <b>2.3 ± 0.3</b> | 0.6 ± 0.1 | -         | 3.8 ± 0.5 | <b>16.0 ± 5.4</b> | -            | 130.0 ± 0.1        | <b>133.8 ± 0.9</b>  |
| 13       | -         | <b>2.4 ± 0.3</b> | 0.6 ± 0.1 | -         | 3.9 ± 0.5 | <b>16.3 ± 5.3</b> | -            | 130.0 ± 0.1        | <b>133.9 ± 0.8</b>  |
| 14       | -         | <b>2.4 ± 0.3</b> | 0.6 ± 0.1 | -         | 3.9 ± 0.4 | <b>16.7 ± 5.2</b> | -            | 130.0 ± 0.1        | <b>133.9 ± 0.7</b>  |
| 15       | -         | <b>2.4 ± 0.3</b> | 0.6 ± 0.1 | -         | 3.9 ± 0.4 | <b>17.0 ± 5.1</b> | -            | 130.0 ± 0.1        | <b>134.0 ± 0.6</b>  |
| 16       | -         | <b>2.4 ± 0.3</b> | 0.6 ± 0.1 | -         | 4.0 ± 0.4 | <b>17.3 ± 4.9</b> | -            | 130.0 ± 0.1        | <b>134.0 ± 0.6</b>  |
| 17       | -         | <b>2.4 ± 0.2</b> | 0.6 ± 0.1 | -         | 4.0 ± 0.4 | <b>17.5 ± 4.8</b> | -            | 130.0 ± 0.0        | <b>134.0 ± 0.5</b>  |
| 18       | -         | <b>2.4 ± 0.2</b> | 0.6 ± 0.1 | -         | 4.0 ± 0.3 | <b>17.8 ± 4.7</b> | -            | 130.0 ± 0.0        | <b>134.0 ± 0.5</b>  |
| 19       | -         | <b>2.5 ± 0.2</b> | 0.6 ± 0.1 | -         | 4.0 ± 0.3 | <b>18.0 ± 4.6</b> | -            | 130.0 ± 0.0        | <b>134.1 ± 0.4</b>  |
| 20       | -         | <b>2.5 ± 0.2</b> | 0.7 ± 0.1 | -         | 4.0 ± 0.3 | <b>18.2 ± 4.5</b> | -            | 130.0 ± 0.0        | <b>134.1 ± 0.4</b>  |

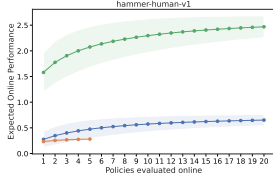

(a) hammer-human EOP.

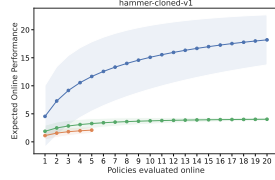

(b) hammer-cloned EOP.

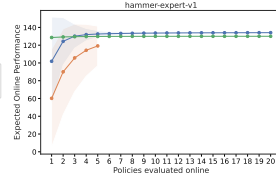

(c) hammer-expert EOP.

Figure 9: TD3+BC, IQL and ReBRAC visualised Expected Online Performance under uniform policy selection on Hammer tasks.

Table 29: TD3+BC, IQL and ReBRAC Expected Online Performance under uniform policy selection on tasks.

| Policies | human      |                  |            | cloned     |            |                  | expert      |                    |                    |
|----------|------------|------------------|------------|------------|------------|------------------|-------------|--------------------|--------------------|
|          | TD3+BC     | IQL              | ReBRAC     | TD3+BC     | IQL        | ReBRAC           | TD3+BC      | IQL                | ReBRAC             |
| 1        | -0.2 ± 0.1 | <b>0.2 ± 0.2</b> | -0.1 ± 0.1 | -0.2 ± 0.1 | -0.0 ± 0.1 | <b>0.5 ± 0.8</b> | 21.4 ± 43.2 | <b>106.0 ± 1.4</b> | 73.5 ± 44.3        |
| 2        | -0.2 ± 0.1 | <b>0.2 ± 0.2</b> | -0.1 ± 0.1 | -0.2 ± 0.1 | 0.0 ± 0.1  | <b>0.9 ± 0.9</b> | 38.8 ± 51.9 | <b>106.8 ± 1.0</b> | 96.0 ± 27.4        |
| 3        | -0.1 ± 0.1 | <b>0.3 ± 0.2</b> | -0.0 ± 0.0 | -0.2 ± 0.1 | 0.1 ± 0.1  | <b>1.2 ± 0.9</b> | 52.6 ± 54.0 | <b>107.2 ± 0.8</b> | 103.7 ± 15.9       |
| 4        | -0.1 ± 0.1 | <b>0.3 ± 0.2</b> | -0.0 ± 0.0 | -0.1 ± 0.1 | 0.1 ± 0.1  | <b>1.4 ± 0.9</b> | 63.7 ± 53.1 | <b>107.4 ± 0.7</b> | 106.7 ± 9.4        |
| 5        | -0.1 ± 0.1 | <b>0.4 ± 0.2</b> | -0.0 ± 0.0 | -0.1 ± 0.0 | 0.1 ± 0.1  | <b>1.6 ± 0.9</b> | 72.5 ± 50.7 | 107.5 ± 0.6        | <b>107.9 ± 5.8</b> |
| 6        | -          | <b>0.4 ± 0.2</b> | -0.0 ± 0.0 | -          | 0.1 ± 0.1  | <b>1.7 ± 0.8</b> | -           | 107.6 ± 0.5        | <b>108.6 ± 3.8</b> |
| 7        | -          | <b>0.4 ± 0.2</b> | -0.0 ± 0.0 | -          | 0.1 ± 0.1  | <b>1.8 ± 0.8</b> | -           | 107.7 ± 0.5        | <b>108.9 ± 2.6</b> |
| 8        | -          | <b>0.4 ± 0.2</b> | 0.0 ± 0.0  | -          | 0.1 ± 0.1  | <b>1.9 ± 0.8</b> | -           | 107.7 ± 0.5        | <b>109.2 ± 1.9</b> |
| 9        | -          | <b>0.5 ± 0.2</b> | 0.0 ± 0.0  | -          | 0.1 ± 0.1  | <b>2.0 ± 0.7</b> | -           | 107.8 ± 0.4        | <b>109.3 ± 1.5</b> |
| 10       | -          | <b>0.5 ± 0.2</b> | 0.0 ± 0.0  | -          | 0.1 ± 0.1  | <b>2.1 ± 0.7</b> | -           | 107.8 ± 0.4        | <b>109.4 ± 1.3</b> |
| 11       | -          | <b>0.5 ± 0.2</b> | 0.0 ± 0.0  | -          | 0.2 ± 0.1  | <b>2.1 ± 0.7</b> | -           | 107.8 ± 0.4        | <b>109.5 ± 1.1</b> |
| 12       | -          | <b>0.5 ± 0.2</b> | 0.0 ± 0.0  | -          | 0.2 ± 0.1  | <b>2.2 ± 0.6</b> | -           | 107.9 ± 0.4        | <b>109.6 ± 1.0</b> |
| 13       | -          | <b>0.5 ± 0.2</b> | 0.0 ± 0.0  | -          | 0.2 ± 0.1  | <b>2.2 ± 0.6</b> | -           | 107.9 ± 0.4        | <b>109.7 ± 0.9</b> |
| 14       | -          | <b>0.5 ± 0.2</b> | 0.0 ± 0.0  | -          | 0.2 ± 0.1  | <b>2.3 ± 0.6</b> | -           | 107.9 ± 0.4        | <b>109.8 ± 0.9</b> |
| 15       | -          | <b>0.5 ± 0.2</b> | 0.0 ± 0.0  | -          | 0.2 ± 0.1  | <b>2.3 ± 0.6</b> | -           | 107.9 ± 0.4        | <b>109.8 ± 0.8</b> |
| 16       | -          | <b>0.5 ± 0.2</b> | 0.0 ± 0.0  | -          | 0.2 ± 0.1  | <b>2.3 ± 0.5</b> | -           | 108.0 ± 0.4        | <b>109.9 ± 0.8</b> |
| 17       | -          | <b>0.6 ± 0.2</b> | 0.0 ± 0.0  | -          | 0.2 ± 0.1  | <b>2.4 ± 0.5</b> | -           | 108.0 ± 0.4        | <b>109.9 ± 0.8</b> |
| 18       | -          | <b>0.6 ± 0.2</b> | 0.0 ± 0.0  | -          | 0.2 ± 0.1  | <b>2.4 ± 0.5</b> | -           | 108.0 ± 0.3        | <b>109.9 ± 0.8</b> |
| 19       | -          | <b>0.6 ± 0.2</b> | 0.0 ± 0.0  | -          | 0.2 ± 0.1  | <b>2.4 ± 0.5</b> | -           | 108.0 ± 0.3        | <b>110.0 ± 0.7</b> |
| 20       | -          | <b>0.6 ± 0.1</b> | 0.0 ± 0.0  | -          | 0.2 ± 0.1  | <b>2.5 ± 0.4</b> | -           | 108.0 ± 0.3        | <b>110.0 ± 0.7</b> |

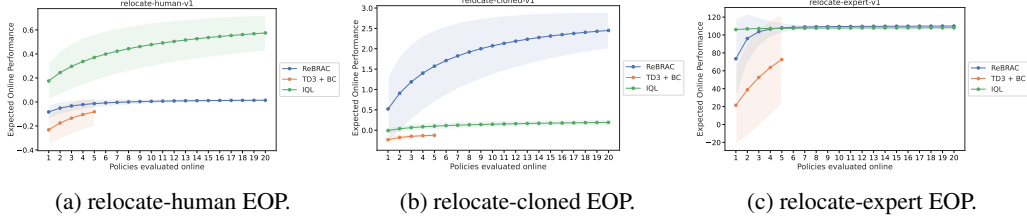

Figure 10: TD3+BC, IQL and ReBRAC visualised Expected Online Performance under uniform policy selection on Relocate tasks.

## 439 F D4RL tasks ablation

Table 30: ReBRAC ablations for halfcheetah tasks. We report final normalized score averaged over 4 unseen training seeds.

| Ablation                  | random               | medium              | expert               | medium-expert        | medium-replay        | full-replay          | Average       |
|---------------------------|----------------------|---------------------|----------------------|----------------------|----------------------|----------------------|---------------|
| TD3+BC, paper             | 11.0 ± 1.1           | 48.3 ± 0.3          | 96.7 ± 1.1           | 90.7 ± 4.3           | 44.6 ± 0.5           | -                    | -             |
| TD3+BC, our               | 2.2 ± 0.0            | 44.6 ± 0.4          | 93.8 ± 0.1           | 91.9 ± 2.3           | 40.5 ± 1.6           | 69.3 ± 0.7           | 57.0          |
| TD3+BC, tuned             | 30.1 ± 1.4 (+0.7%)   | 55.4 ± 0.9 (-15.2%) | 95.5 ± 0.5 (-9.6%)   | 91.9 ± 2.3 (-11.4%)  | 45.1 ± 1.7 (-11.0%)  | 74.1 ± 2.9 (-9.5%)   | 65.3 (-10.3%) |
| ReBRAC w/o LN             | 32.0 ± 1.5 (+7.0%)   | 64.3 ± 4.1 (-1.5%)  | 61.7 ± 20.4 (-41.5%) | 86.7 ± 0.9 (-16.3%)  | 52.8 ± 2.4 (+4.1%)   | 82.1 ± 2.1 (+0.2%)   | 63.2 (-13.1%) |
| ReBRAC w/o layer          | 27.8 ± 3.4 (-7.0%)   | 65.0 ± 1.6 (-0.4%)  | 74.4 ± 26.7 (-29.5%) | 86.7 ± 8.8 (-16.3%)  | 50.4 ± 0.7 (-0.5%)   | 80.9 ± 1.1 (-1.2%)   | 64.1 (-11.9%) |
| ReBRAC w/o actor penalty  | 31.8 ± 4.1 (+6.3%)   | 64.5 ± 0.7 (-1.2%)  | 4.3 ± 4.3 (-95.9%)   | 71.6 ± 12.3 (-30.9%) | 38.0 ± 27.2 (-25.0%) | 59.3 ± 41.3 (-27.5%) | 44.9 (-38.3%) |
| ReBRAC w/o critic penalty | 28.1 ± 1.6 (-6.0%)   | 65.7 ± 1.4 (+0.6%)  | 104.2 ± 5.9 (-1.3%)  | 100.5 ± 3.1 (-3.0%)  | 50.7 ± 0.1 (0.0%)    | 81.7 ± 1.2 (-0.2%)   | 71.8 (-1.3%)  |
| ReBRAC w/o large batch    | 21.0 ± 15.7 (-29.7%) | 65.8 ± 0.7 (+0.7%)  | 62.6 ± 24.3 (-40.7%) | 85.2 ± 7.3 (-17.8%)  | 50.7 ± 1.1 (0.0%)    | 81.9 ± 1.4 (0.0%)    | 61.2 (-15.9%) |
| ReBRAC                    | 29.9 ± 1.2           | 65.3 ± 1.1          | 105.6 ± 1.5          | 103.7 ± 3.9          | 50.7 ± 0.6           | 81.9 ± 1.4           | 72.8          |

Table 31: ReBRAC ablations for hopper tasks. We report final normalized score averaged over 4 unseen training seeds.

| Ablation                  | random               | medium              | expert               | medium-expert       | medium-replay        | full-replay          | Average       |
|---------------------------|----------------------|---------------------|----------------------|---------------------|----------------------|----------------------|---------------|
| TD3+BC, paper             | 8.5 ± 0.6            | 59.3 ± 4.2          | 107.8 ± 7.0          | 98.0 ± 9.4          | 60.9 ± 18.8          | -                    | -             |
| TD3+BC, our               | 10.3 ± 1.8           | 53.2 ± 2.2          | 108.7 ± 5.3          | 75.8 ± 8.9          | 64.5 ± 24.9          | 49.9 ± 9.6           | 60.4          |
| TD3+BC, tuned             | 10.3 ± 1.8 (+51.5%)  | 57.6 ± 6.8 (-43.2%) | 110.7 ± 2.1 (+21.1%) | 106.2 ± 2.5 (-3.4%) | 64.5 ± 24.9 (-30.8%) | 106.2 ± 2.2 (-0.6%)  | 75.9 (-10.6%) |
| ReBRAC w/o LN             | 12.2 ± 13.3 (+79.4%) | 1.0 ± 0.6 (-99.0%)  | 111.1 ± 1.0 (+21.6%) | 112.4 ± 0.7 (+2.3%) | 57.4 ± 25.0 (-38.5%) | 107.2 ± 2.0 (+0.4%)  | 66.8 (-21.3%) |
| ReBRAC w/o layer          | 8.8 ± 0.6 (+29.4%)   | 101.8 ± 0.2 (+0.4%) | 103.7 ± 5.1 (+13.5%) | 104.1 ± 7.7 (-5.3%) | 97.5 ± 3.5 (+4.5%)   | 106.5 ± 0.3 (-0.3%)  | 87.0 (+25.5%) |
| ReBRAC w/o actor penalty  | 7.5 ± 4.6 (+10.3%)   | 1.7 ± 1.2 (-98.3%)  | 1.1 ± 0.5 (-98.8%)   | 1.6 ± 1.6 (-98.5%)  | 24.4 ± 8.7 (-73.8%)  | 27.7 ± 23.4 (-74.1%) | 10.6 (-87.5%) |
| ReBRAC w/o critic penalty | 7.4 ± 1.1 (+8.8%)    | 102.3 ± 0.5 (+0.9%) | 103.4 ± 8.6 (+13.1%) | 111.2 ± 0.7 (+1.2%) | 83.1 ± 30.9 (-10.9%) | 107.5 ± 0.1 (+0.7%)  | 85.8 (+1.1%)  |
| ReBRAC w/o large batch    | 8.6 ± 0.5 (+26.5%)   | 98.9 ± 5.2 (-2.5%)  | 98.8 ± 13.4 (+8.1%)  | 107.8 ± 2.9 (-1.9%) | 96.2 ± 7.6 (+3.1%)   | 106.6 ± 0.2 (-0.2%)  | 86.1 (+1.4%)  |
| ReBRAC                    | 6.8 ± 3.4            | 101.4 ± 1.5         | 91.4 ± 4.7           | 109.9 ± 3.0         | 93.3 ± 7.5           | 106.8 ± 0.6          | 84.9          |

Table 32: ReBRAC ablations for walker2d tasks. We report final normalized score averaged over 4 unseen training seeds.

| Ablation                  | random               | medium             | expert              | medium-expert        | medium-replay        | full-replay          | Average       |
|---------------------------|----------------------|--------------------|---------------------|----------------------|----------------------|----------------------|---------------|
| TD3+BC, paper             | 1.6 ± 1.7            | 83.7 ± 2.1         | 110.2 ± 0.3         | 110.1 ± 0.5          | 81.8 ± 5.5           | -                    | -             |
| TD3+BC, our               | 4.5 ± 2.2            | 77.1 ± 1.9         | 109.1 ± 0.5         | 108.9 ± 0.3          | 50.9 ± 13.7          | 86.7 ± 5.1           | 72.8          |
| TD3+BC, tuned             | 4.5 ± 2.2 (-78.8%)   | 77.1 ± 1.9 (-5.5%) | 110.1 ± 0.1 (-2.0%) | 110.2 ± 0.7 (-1.3%)  | 58.8 ± 28.5 (-22.2%) | 89.4 ± 8.2 (-13.0%)  | 75.0 (-10.9%) |
| ReBRAC w/o LN             | 1.3 ± 1.5 (-93.9%)   | 84.3 ± 2.5 (+3.3%) | 8.3 ± 3.1 (-92.6%)  | 52.7 ± 53.9 (-52.8%) | 78.9 ± 8.4 (+4.4%)   | 61.1 ± 46.6 (-40.6%) | 47.7 (-43.3%) |
| ReBRAC w/o layer          | 11.4 ± 11.9 (-46.5%) | 86.2 ± 0.9 (+5.6%) | 112.1 ± 0.1 (-0.2%) | 111.9 ± 0.2 (+0.2%)  | 83.9 ± 5.4 (+11.0%)  | 101.8 ± 0.9 (-1.0%)  | 84.5 (-0.4%)  |
| ReBRAC w/o actor penalty  | 1.1 ± 0.9 (-94.8%)   | 1.7 ± 2.1 (-97.9%) | 0.9 ± 1.1 (-99.2%)  | 0.8 ± 1.3 (-99.3%)   | 8.9 ± 5.7 (-88.2%)   | 64.2 ± 29.5 (-37.5%) | 12.9 (-84.7%) |
| ReBRAC w/o critic penalty | 19.8 ± 3.6 (-7.0%)   | 81.6 ± 9.2 (0.0%)  | 112.0 ± 0.1 (-0.3%) | 111.6 ± 0.3 (-0.1%)  | 87.0 ± 4.5 (+15.1%)  | 103.5 ± 1.5 (+0.7%)  | 85.9 (+2.0%)  |
| ReBRAC w/o large batch    | 5.6 ± 0.2 (-73.7%)   | 84.8 ± 1.0 (+3.9%) | 112.2 ± 0.2 (-0.1%) | 110.9 ± 0.2 (-0.7%)  | 71.7 ± 20.2 (-5.2%)  | 97.7 ± 5.8 (-5.0%)   | 80.4 (-4.5%)  |
| ReBRAC                    | 21.3 ± 0.8           | 81.6 ± 3.9         | 112.3 ± 0.0         | 111.7 ± 0.3          | 75.6 ± 10.3          | 102.8 ± 0.9          | 84.2          |

Table 33: ReBRAC ablations for AntMaze tasks. We report final normalized score averaged over 4 unseen training seeds.

| Ablation                   | umaze                | umaze-diverse        | medium-play          | medium-diverse       | large-play           | large-diverse        | Average       |
|----------------------------|----------------------|----------------------|----------------------|----------------------|----------------------|----------------------|---------------|
| TD3+BC, paper              | 78.6                 | 71.4                 | 10.6                 | 3.0                  | 0.2                  | 0.0                  | 27.3          |
| TD3+BC, our                | 62.0 ± 2.4           | 48.0 ± 11.6          | 0.0 ± 0.0            | 0.5 ± 1              | 0.0 ± 0.0            | 0.5 ± 0.5            | 18.5          |
| TD3+BC, tuned              | 62.0 ± 2.4 (-36.8%)  | 48.0 ± 11.6 (-42.9%) | 39.0 ± 21.7 (-54.8%) | 18.5 ± 17.7 (-72.1%) | 0.2 ± 0.5 (-99.6%)   | 0.0 ± 1.0 (-100.0%)  | 27.9 (-62.9%) |
| ReBRAC w/o $\gamma$ change | 0.0 ± 0.0 (-100.0%)  | 90.7 ± 3.2 (+7.7%)   | 1.0 ± 0.0 (-98.8%)   | 0.2 ± 0.5 (-99.7%)   | 19.3 ± 18.5 (-58.0%) | 15.0 ± 8.0 (-79.0%)  | 21.0 (-72.1%) |
| ReBRAC w/o LN              | 0.0 ± 0.0 (-100.0%)  | 0.0 ± 0.0 (-100.0%)  | 0.0 ± 0.0 (-100.0%)  | 0.0 ± 0.0 (-100.0%)  | 0.0 ± 0.0 (-100.0%)  | 0.0 ± 0.0 (-100.0%)  | 0.0 (-100.0%) |
| ReBRAC w/o layer           | 31.0 ± 45.4 (-68.4%) | 61.7 ± 25.3 (-26.7%) | 0.0 ± 0.0 (-100.0%)  | 16.0 ± 32.0 (-75.8%) | 0.0 ± 0.0 (-100.0%)  | 0.0 ± 0.0 (-100.0%)  | 18.1 (-76.0%) |
| ReBRAC w/o actor penalty   | 1.0 ± 1.1 (-99.0%)   | 0.0 ± 0.0 (-100.0%)  | 0.0 ± 0.0 (-100.0%)  | 0.0 ± 0.0 (-100.0%)  | 0.0 ± 0.0 (-100.0%)  | 0.0 ± 0.0 (-100.0%)  | 0.1 (-99.9%)  |
| ReBRAC w/o critic penalty  | 98.2 ± 1.5 (0.0%)    | 78.0 ± 26.3 (-7.4%)  | 86.2 ± 2.6 (0.0%)    | 57.5 ± 24.2 (-13.1%) | 56.7 ± 32.9 (+23.3%) | 57.0 ± 16.4 (-20.3%) | 72.2 (-4.1%)  |
| ReBRAC w large batch       | 60.7 ± 31.3 (-38.2%) | 68.5 ± 17.9 (-18.6%) | 43.9 ± 49.9 (-49.1%) | 34.0 ± 40.6 (-48.6%) | 39.2 ± 45.9 (-14.8%) | 0.0 ± 0.0 (-100.0%)  | 41.0 (-45.6%) |
| ReBRAC                     | 98.2 ± 0.9           | 84.2 ± 18.5          | 86.2 ± 4.7           | 66.2 ± 16.3          | 46.0 ± 40.0          | 71.5 ± 12.3          | 75.3          |

Table 34: ReBRAC ablations for pen tasks. We report final normalized score averaged over 4 unseen training seeds.

| Ablation                  | human                    | cloned                    | expert                   | Average        |
|---------------------------|--------------------------|---------------------------|--------------------------|----------------|
| TD3+BC, paper             | 0.0                      | 0.0                       | 0.3                      | 0.0            |
| TD3+BC, our               | 65.9 $\pm$ 24.6          | 78.1 $\pm$ 5.7            | 144.9 $\pm$ 7.5          | 96.3           |
| TD3+BC, tuned             | 77.6 $\pm$ 18.5 (-23.9%) | 78.1 $\pm$ 5.7 (-8.5%)    | 144.9 $\pm$ 7.5 (-10.3%) | 100.2 (-12.5%) |
| ReBRAC w/o LN             | 78.6 $\pm$ 14.8 (-22.9%) | 21.3 $\pm$ 11.0 (-75.1%)  | 86.7 $\pm$ 59.8 (-44.6%) | 62.1 (-45.8%)  |
| ReBRAC w/o layer          | 89.1 $\pm$ 14.7 (-12.6%) | 106.7 $\pm$ 13.9 (+24.9%) | 147.2 $\pm$ 5.7 (-6.0%)  | 114.3 (-0.3%)  |
| ReBRAC w/o actor penalty  | -0.5 $\pm$ 1.3 (-100.5%) | 0.6 $\pm$ 1.6 (-99.3%)    | 0.0 $\pm$ 3.6 (-100.0%)  | 0.0 (-100.0%)  |
| ReBRAC w/o critic penalty | 99.9 $\pm$ 6.1 (-2.1%)   | 75.0 $\pm$ 16.7 (-12.2%)  | 154.6 $\pm$ 1.8 (-1.3%)  | 109.8 (-4.2%)  |
| ReBRAC w large batch      | 67.2 $\pm$ 9.0 (-34.1%)  | 83.2 $\pm$ 23.3 (-2.6%)   | 155.0 $\pm$ 6.8 (-1.0%)  | 101.8 (-11.2%) |
| ReBRAC                    | 102.0 $\pm$ 10.8         | 85.4 $\pm$ 24.2           | 156.6 $\pm$ 1.4          | 114.6          |

Table 35: ReBRAC ablations for door tasks. We report final normalized score averaged over 4 unseen training seeds.

| Ablation                  | human              | cloned                   | expert                  | Average       |
|---------------------------|--------------------|--------------------------|-------------------------|---------------|
| TD3+BC, paper             | 0.0                | 0.0                      | 0.0                     | 0.0           |
| TD3+BC, our               | 0.0 $\pm$ 0.1      | 0.4 $\pm$ 1.0            | 102.5 $\pm$ 2.9         | 34.3          |
| TD3+BC, tuned             | 0.0 $\pm$ 0.1 (-)  | 0.4 $\pm$ 1.0 (+100.0%)  | 105.8 $\pm$ 0.3 (+0.8%) | 35.4 (+1.1%)  |
| ReBRAC w/o LN             | -0.1 $\pm$ 0.0 (-) | -0.3 $\pm$ 0.0 (-250.0%) | 106.0 $\pm$ 0.8 (+1.0%) | 35.1 (+0.3%)  |
| ReBRAC w/o layer          | 0.0 $\pm$ 0.0 (-)  | 0.1 $\pm$ 0.5 (-50.0%)   | 104.4 $\pm$ 2.3 (-0.5%) | 34.8 (-0.6%)  |
| ReBRAC w/o actor penalty  | -0.1 $\pm$ 0.1 (-) | 0.0 $\pm$ 0.0 (-100.0%)  | 0.0 $\pm$ 0.2 (-100.0%) | 0.0 (-100.0%) |
| ReBRAC w/o critic penalty | 0.0 $\pm$ 0.0 (-)  | 0.1 $\pm$ 0.0 (-50.0%)   | 106.1 $\pm$ 0.3 (+1.1%) | 35.4 (+1.1%)  |
| ReBRAC w large batch      | -0.1 $\pm$ 0.1 (-) | 0.1 $\pm$ 0.3 (-50.0%)   | 106.1 $\pm$ 0.1 (+1.1%) | 35.3 (+0.9%)  |
| ReBRAC                    | 0.0 $\pm$ 0.0      | 0.2 $\pm$ 0.3            | 104.9 $\pm$ 2.2         | 35.0          |

Table 36: ReBRAC ablations for hammer tasks. We report final normalized score averaged over 4 unseen training seeds.

| Ablation                  | human                   | cloned                    | expert                  | Average       |
|---------------------------|-------------------------|---------------------------|-------------------------|---------------|
| TD3+BC, paper             | 0.0                     | 0.0                       | 0.0                     | 0.0           |
| TD3+BC, our               | 0.3 $\pm$ 0.4           | 1.1 $\pm$ 1.1             | 127.0 $\pm$ 0.4         | 42.8          |
| TD3+BC, tuned             | 0.3 $\pm$ 0.4 (+50.0%)  | 1.1 $\pm$ 1.1 (-80.0%)    | 127.0 $\pm$ 0.4 (-5.3%) | 42.8 (-8.1%)  |
| ReBRAC w/o LN             | 0.2 $\pm$ 0.0 (0.0%)    | 1.0 $\pm$ 1.0 (-81.8%)    | 9.9 $\pm$ 19.1 (-92.6%) | 3.6 (-92.3%)  |
| ReBRAC w/o layer          | 0.1 $\pm$ 0.0 (-50.0%)  | 21.3 $\pm$ 19.7 (+287.3%) | 133.1 $\pm$ 0.5 (-0.8%) | 51.5 (+10.5%) |
| ReBRAC w/o actor penalty  | 0.0 $\pm$ 0.0 (-100.0%) | 0.0 $\pm$ 0.1 (-100.0%)   | 0.0 $\pm$ 0.1 (-100.0%) | 0.0 (-100.0%) |
| ReBRAC w/o critic penalty | 0.1 $\pm$ 0.1 (-50.0%)  | 1.9 $\pm$ 0.7 (-65.5%)    | 134.1 $\pm$ 0.2 (-0.1%) | 45.3 (-2.8%)  |
| ReBRAC w large batch      | 0.3 $\pm$ 0.8 (+50.0%)  | 10.6 $\pm$ 14.0 (+92.7%)  | 133.4 $\pm$ 0.5 (-0.6%) | 48.1 (+3.2%)  |
| ReBRAC                    | 0.2 $\pm$ 0.2           | 5.5 $\pm$ 2.5             | 134.2 $\pm$ 0.4         | 46.6          |

Table 37: ReBRAC ablations for relocate tasks. We report final normalized score averaged over 4 unseen training seeds.

| Ablation                  | human              | cloned                   | expert                   | Average        |
|---------------------------|--------------------|--------------------------|--------------------------|----------------|
| TD3+BC, paper             | 0.0                | 0.0                      | 0.0                      | 0.0            |
| TD3+BC, our               | 0.0 $\pm$ 0.0      | -0.1 $\pm$ 0.0           | 107.9 $\pm$ 0.6          | 35.9           |
| TD3+BC, tuned             | 0.0 $\pm$ 0.0 (-)  | -0.1 $\pm$ 0.0 (-105.3%) | 107.9 $\pm$ 0.6 (+1.2%)  | 35.9 (-0.5%)   |
| ReBRAC w/o LN             | -0.2 $\pm$ 0.0 (-) | 0.0 $\pm$ 0.3 (-100.0%)  | -0.1 $\pm$ 0.0 (-100.1%) | -0.1 (-100.3%) |
| ReBRAC w/o layer          | 0.1 $\pm$ 0.3 (-)  | 1.7 $\pm$ 2.1 (-10.5%)   | 105.0 $\pm$ 3.1 (-1.5%)  | 35.6 (-1.4%)   |
| ReBRAC w/o actor penalty  | -0.1 $\pm$ 0.0 (-) | 0.0 $\pm$ 0.0 (-100.0%)  | -0.1 $\pm$ 0.1 (-100.1%) | 0.0 (-100.0%)  |
| ReBRAC w/o critic penalty | 0.0 $\pm$ 0.1 (-)  | 1.9 $\pm$ 1.9 (0.0%)     | 109.6 $\pm$ 1.2 (+2.8%)  | 37.1 (+2.8%)   |
| ReBRAC w large batch      | 0.0 $\pm$ 0.0 (-)  | 0.1 $\pm$ 0.2 (-94.7%)   | 109.6 $\pm$ 0.9 (+2.8%)  | 36.5 (+1.1%)   |
| ReBRAC                    | 0.0 $\pm$ 0.0      | 1.9 $\pm$ 2.3            | 106.6 $\pm$ 3.1          | 36.1           |
